# Supplementary material for: Human papillomavirus types from infection to cancer in the anus, according to sex and HIV status: a systematic review and meta-analysis
Source: PubMed Central journal article supplement — Lancet Infect Dis. 2018 Feb;18(2):198–206. doi: 10.1016/S1473-3099(17)30653-9 (PMC5805865; doi:10.1016/s1473-3099(17)30653-9), 2018-02
Supplement: mmc1.pdf [file mmc1.pdf]

# THE LANCET

## Infectious Diseases

### Supplementary appendix

This appendix formed part of the original submission and has been peer reviewed. We post it as supplied by the authors.

Supplement to: Lin C, Franceschi S, Clifford G M. Human papillomavirus types from infection to cancer in the anus, according to sex and HIV status: a systematic review and meta-analysis. *Lancet Infect Dis* 2017; published online Nov 17. [http://dx.doi.org/10.1016/S1473-3099\(17\)30653-9](http://dx.doi.org/10.1016/S1473-3099(17)30653-9).

## Supplementary appendix

**Supplement to:** Lin C, Franceschi S, Clifford GM. Human papillomavirus types from infection to cancer in the anus according to sex and HIV status: a systematic review and meta-analysis

## Supplementary appendix

### Table of contents

|                                                                                                                                                                                                                                                                          |    |
|--------------------------------------------------------------------------------------------------------------------------------------------------------------------------------------------------------------------------------------------------------------------------|----|
| <b>Search strategy</b> .....                                                                                                                                                                                                                                             | 3  |
| <b>Acknowledgements</b> .....                                                                                                                                                                                                                                            | 4  |
| <b>Appendix Tables</b> .....                                                                                                                                                                                                                                             | 6  |
| <b>Appendix Table 1:</b> Description of included studies .....                                                                                                                                                                                                           | 6  |
| <b>Appendix Table 2:</b> Prevalence of single and multiple infections of human papillomavirus (HPV) types* in HPV-positive anal cancer by HIV status (sensitivity analysis showing known HIV-negative and HIV-unknown anal cancers separately) .                         | 12 |
| <b>Appendix Table 3:</b> Prevalence of human papillomavirus (HPV) types in HPV-positive men by anal diagnosis and HIV status .....                                                                                                                                       | 13 |
| <b>Appendix Table 4:</b> Prevalence of human papillomavirus (HPV) types in HPV-positive women by anal diagnosis and HIV status .....                                                                                                                                     | 14 |
| <b>Appendix Figures</b> .....                                                                                                                                                                                                                                            | 15 |
| <b>Appendix Figure 1:</b> Overall human papillomavirus (HPV) prevalence by gender, anal diagnosis* and HIV status (sensitivity analysis including known HIV-negative anal cancers only).....                                                                             | 15 |
| <b>Appendix Figure 2:</b> Prevalence of human papillomavirus 16 (HPV16), HPV18, HPV31/33/45/52/58 and prevalence ratio (PR) by anal diagnosis* and HIV status, in HPV-positive men and women (sensitivity analysis including known HIV-negative anal cancers only) ..... | 16 |
| <b>Appendix Figure 3:</b> Cancer:normal prevalence ratio (PR) in human papillomavirus (HPV)-positive samples of HPV types by HIV status (sensitivity analysis including known HIV-negative anal cancers only).....                                                       | 17 |
| <b>Appendix Figure 4:</b> Prevalence of human papillomavirus 16 (HPV16), HPV18, HPV31/33/45/52/58 and prevalence ratio (PR) in HPV-positive men by anal diagnosis* and HIV status: in North America only .....                                                           | 18 |
| <b>Appendix Figure 5:</b> Prevalence of human papillomavirus 16 (HPV16), HPV18, HPV31/33/45/52/58 and prevalence ratio (PR) in HPV-positive men by anal diagnosis* and HIV status: in Europe only .....                                                                  | 19 |
| <b>Appendix Figure 6:</b> Prevalence of human papillomavirus 16 (HPV16), HPV18, HPV31/33/45/52/58 and prevalence ratio (PR) in HPV-positive men by nine grades of cytological and histological anal diagnosis and HIV status.....                                        | 20 |
| <b>Appendix Figure 7:</b> Prevalence of human papillomavirus 16 (HPV16), HPV18, HPV31/33/45/52/58 and prevalence ratio (PR) in HPV-positive women by nine grades of cytological and histological anal diagnosis and HIV status .....                                     | 21 |
| <b>Appendix Figure 8:</b> Funnel plots of human papillomavirus 16 (HPV16) prevalence in HPV-positive men by anal diagnosis* and HIV status.....                                                                                                                          | 22 |
| <b>Appendix Figure 9:</b> Funnel plots of human papillomavirus 16 (HPV16) prevalence in HPV-positive women by anal diagnosis* and HIV status.....                                                                                                                        | 23 |

## Search strategy

### MEDLINE

("papillomaviridae"[All Fields] OR "papillomavirus"[All Fields] OR "HPV"[All Fields]) AND (("anal"[All Fields] AND "canal"[All Fields]) OR "anal canal"[All Fields] OR "anus"[All Fields] OR "anal"[All Fields])

### EMBASE

('papillomaviridae':ta,ab,kw,ti OR 'papillomavirus':ta,ab,kw,ti OR 'hpv':ta,ab,kw,ti OR 'human papillomavirus':ta,ab,kw,ti) AND ('anal':ta,ab,kw,ti AND 'canal':ta,ab,kw,ti OR 'anal':ta,ab,kw,ti OR 'canal':ta,ab,kw,ti OR 'anus':ta,ab,kw,ti OR 'anal canal':ta,ab,kw,ti) AND ([article]/lim OR [article in press]/lim OR [review]/lim) AND [humans]/lim AND [embase]/lim

### Cochrane

("papillomaviridae" or "papillomavirus" or "HPV" or "human papillomavirus") and (("anal" and "canal") or ("anal" or "canal") or "anal" or "anus" or "anal canal")

## Acknowledgements

We acknowledge the following authors who provided data in a format that was not available in original publications:

**Studies from countries/regions in North America:** Julia E Hood and Stephen E Hawes (University of Washington, Seattle, USA); Nancy A. Hessol, Alexandra Hernandez and Joel M. Palefsky (WIHS study, University of California, San Francisco, USA); Amy Yang and Edyta C. Pirog (Weill Medical College of Cornell University, New York, USA); Paul Brassard (Jewish General Hospital, Montreal, Canada); Brian Lowe and Ha Thai (Qiagen, Gaithersburg, USA); Nicolas F. Schlecht and Robert D. Burk (Albert Einstein College of Medicine, New York, USA); Mark Gilbert (British Columbia Centre for Disease Control, Vancouver, Canada); Lois Conley, Kate Buchacz, John T. Brooks, Pragna Patel and Tim Bush (SUN study, Centers for Disease Control and Prevention, Atlanta, USA); Ina U. Park (University of Minnesota, Minneapolis, USA); François Coutlée (Hôpital Notre-Dame du Centre Hospitalier de l'Université de Montréal, Canada); Janet R. Daling (Fred Hutchinson Cancer Research Center, Seattle, USA); Cathy W. Critchlow (University of Washington, Seattle, USA); John A. Schneider and Andrew D. Richardson (University of Chicago, USA); Jacob Sambursky (University of Central Florida, USA), Joseph Terlizzi, Stephen E. Goldstone and Angela Diaz (Icahn School of Medicine at Mount Sinai, New York, USA); Michael Hagensee (LSUHSC School of Medicine, New Orleans, USA); Michael Herfs (University of Liege, Belgium); Laia Alemany (Institut Català d'Oncologia, Barcelona, Spain); Anna-Barbara Moscicki (REACH study, University of California, San Francisco, USA); Jon H. Chung and Siraj M. Ali (Foundation Medicine, Massachusetts, USA); Yiang Hui and Li Juan Wang (Alpert Medical School of Brown University, Rhode Island, USA); Mona Saraiya and Martin Steinau (Centers for Disease Control and Prevention, Atlanta GA, USA); GypsyAmber D'Souza, Lisa Jacobson and Francine Barrington (Multicenter AIDS Cohort Study [MACS], USA).

**Studies from countries/regions in Europe:** Henry C. Kitchener (ANALOGY study, Institute of Cancer Sciences, The University of Manchester, UK); Joaquin Burgos (Hospital Universitari Vall d'Hebron, Barcelona, Spain); Riad Arana (Hôpitaux universitaires Paris Est, AP-HP, Paris, France); Isabelle Etienney (Groupe Hospitalier Diaconesses Croix Saint-Simon, Paris, France); Andrew G Renehan (University of Manchester, UK); Andrea De Luca and Alberto Borghetti (Università Cattolica del Sacro Cuore, Rome, Italy); Anna Rosa Garbuglia and Adriana Ammassari (National Institute for Infectious Diseases, Rome, Italy); Isabelle Heard and Valérie Potard (ANRS-C017 VIHGY Study, France); Carmen Hidalgo-Tenorio (University Hospital Virgen de las Nieves, Granada, Spain); Andrea Casadei Gardini (Istituto Scientifico Romagnolo per lo Studio e la Cura dei Tumori (IRST) IRCCS, Meldola, Italy); Benjamín García Espinosa and Ernesto Moro Rodríguez (Rey Juan Carlos University, Madrid, Spain); Giulia Marchetti, Francesca Bai and Antonella d'Arminio Monforte (University of Milan, Italy); Kathleen W.M. D'Hauwers (Radboud University Nijmegen, Medical Centre, The Netherlands); Alessandra Pierangeli and Guido Antonelli (Sapienza University, Rome, Italy); Maria Gabriella Donà (San Gallicano Dermatological Institute, Rome, Italy); Alexander Kreuter (Ruhr University Bochum, Bochum, Germany), Ulrike Wieland (University of Cologne, Germany); Jean-Philippe Lanoix (Amiens University Hospital, France); Laurent Abramowitz (EDiTH V study, CHU Bichat, Paris, France); Christiane Mougin and

Jean-Luc Pretet (Universite de Franche-Comte, Besançon, France); Michel Segondy (Hôpital St-Eloi, Montpellier, France); Elisabetta Tanzi (University of Milan, Italy); Dorothee Decker (University of Bonn, Germany); Christophe Piketty (Hôpital Européen Georges Pompidou, Paris, France); Laura Padilla España (Hospital Costa del Sol, Marbella, Spain); Michael Herfs (University of Liege, Belgium); Hugo De Vuyst (International Agency for Research on Cancer, Lyon, France); Karien Gosens (Academic Medical Center, Amsterdam, The Netherlands); Laia Alemany (Institut Català d'Oncologia, Barcelona, Spain); Attila T. Lorincz and Peter Sasieni (Queen Mary University of London, UK).

**Studies from countries/regions in Latin America:** Aimée R. Kreimer and John Schussler (National Cancer Institute, NIH, Bethesda, USA); Paula Gonzalez (Fundación INCIENSA, Costa Rica); Paula M. Luz and Beatriz Grinsztejn (Universidade de São Paulo, Brazil); Victor Hugo Melo and Mark Drew Crosland Guimaraes (Universidade Federal de Minas Gerais, Belo Horizonte, Brazil); Livia Bravo Maia (Center of University Hospital of Brasilia, Brazil); Fernanda Kesselring Tso (Universidade Federal de São Paulo, Brazil); Ana P. Ortiz Martinez (University of Puerto Rico, San Juan, Puerto Rico); Laia Alemany (Institut Català d'Oncologia, Barcelona, Spain); Alcina F. Nicol (Oswaldo Cruz Foundation, Rio de Janeiro, Brazil), W. Martin Kast (University of Southern California, USA); Allini Mafra (Barretos Cancer Hospital, São Paulo, Brazil), Cristina Mendes de Oliveira and Adhemar Longatto-Filho (University of São Paulo, Brazil); Sandra de Andrade Heráclio, Melania Maria Ramos Amorim and Alex Sandro Rolland de Souza (Instituto de Medicina Integral Prof. Fernando Figueira (IMIP), Brazil).

**Studies from countries/regions in Asia and Oceania:** Shu-Hsing Cheng and Yu-Mei Hsueh (Taipei Medical University, Taipei, Taiwan); Nittaya Phanuphak and Stephen J. Kerr (The Thai Red Cross AIDS Research Centre, Bangkok, Thailand); Quanhathai Kaewpoowat, Pongpun Saokhieo and Suwat Chariyalertsak (Chiang Mai University, Thailand); Mu Mu Shwe (Ministry of Health, Yangon, Myanmar, Japan), Shigeru Okada (Okayama University, Japan); Sun Hee Lee (Pusan National University Hospital, Korea); Fengyi Jin, Mary Poynten and Andrew E. Grulich (SPANC study, University of New South Wales, Sydney, Australia); Laia Alemany (Institut Català d'Oncologia, Barcelona, Spain); Simpson Steve Jr and Richard Turner (University of Tasmania, Hobart, Australia); Kazuyoshi Shigehara (Kanazawa University Graduate School of Medical Science, Japan).

**Studies from countries/regions in Africa:** Zizipho Mbulawa and Anna-Lise Williamson (University of Cape Town, South Africa), Cynthia S. Firnhaber (University of the Witwatersrand, Johannesburg, South Africa), Timothy J Wilkin (Weill Cornell Medicine, New York, USA); Tharcisse Mpunga (Butaro Cancer Centre of Excellence, Rwanda); Laia Alemany (Institut Català d'Oncologia, Barcelona, Spain).

## Appendix Tables

**Appendix Table 1: Description of included studies**

| First author         | Journal/conference          | Year | Country/region | Sample | Primer         | HIV      | Gender | Normal | Low-grade* | High-grade† | Cancer |
|----------------------|-----------------------------|------|----------------|--------|----------------|----------|--------|--------|------------|-------------|--------|
| <b>North America</b> |                             |      |                |        |                |          |        |        |            |             |        |
| Hui Y                | Am J Surg Pathol            | 2017 | USA            | Biopsy | Other          | Positive | Men    |        |            | 11          | 1      |
|                      |                             |      |                |        |                | Negative | Men    |        |            | 11          | 2      |
|                      |                             |      |                |        |                | Positive | Women  |        |            | 1           |        |
|                      |                             |      |                |        |                | Negative | Women  |        |            | 25          | 4      |
| Hagensee M           | IPV conference abstract     | 2017 | USA            | Cells  | PGMY09/11      | Positive | Men    | 61     | 87         | 13          |        |
|                      |                             |      |                |        |                | Positive | Women  | 33     | 44         | 3           |        |
| Keglovitz K          | LGBT Health                 | 2016 | USA            | Cells  | cobas          | Positive | Men    | 9      | 35         |             |        |
|                      |                             |      |                |        |                | Negative | Men    | 4      | 6          |             |        |
| Cronin B             | Gynecol Oncol               | 2016 | USA            | Cells  | Other          | Negative | Women  |        |            | 7           | 1      |
| Herfs M              | J Pathol                    | 2016 | USA            | Biopsy | Other          | Positive | Men    |        |            |             | 4      |
|                      |                             |      |                |        |                | Negative | Men    |        |            |             | 19     |
|                      |                             |      |                |        |                | Negative | Women  |        |            |             | 27     |
| Chung JH             | Ann Oncol                   | 2016 | USA            | Biopsy | Other          | Unknown  | Men    |        |            |             | 22     |
|                      |                             |      |                |        |                | Unknown  | Women  |        |            |             | 48     |
| D'Souza G            | J Acquir Immune Defic Syndr | 2016 | USA            | Cells  | PGMY09/11      | Positive | Men    | 411    | 244        | 31          |        |
|                      |                             |      |                |        |                | Negative | Men    | 561    | 165        | 24          |        |
| Sambursky J          | IANS conference abstract    | 2016 | USA            | Cells  | cobas          | Positive | Men    | 65     | 139        | 40          |        |
|                      |                             |      |                |        |                | Negative | Men    | 101    | 190        | 49          |        |
|                      |                             |      |                |        |                | Negative | Women  | 7      | 8          | 2           |        |
| Alemany L            | Int J Cancer                | 2015 | USA            | Biopsy | SPF10          | Unknown  | Men    |        |            |             | 39     |
|                      |                             |      |                |        |                | Unknown  | Women  |        |            |             | 57     |
| Hood JE              | Int J STD AIDS              | 2015 | USA            | Cells  | MY09/11        | Positive | Men    | 113    | 161        | 11          |        |
| Hessol NA            | Aids                        | 2013 | USA            | Cells  | MY09/11; HMB01 | Positive | Women  | 283    | 88         | 36          |        |
|                      |                             |      |                |        |                | Negative | Women  | 147    | 12         | 2           |        |
| Meyer JE             | J Gastrointest Cancer       | 2013 | USA            | Biopsy | SPF10          | Positive | Men    |        |            |             | 10     |
|                      |                             |      |                |        |                | Negative | Men    |        |            |             | 13     |
|                      |                             |      |                |        |                | Positive | Women  |        |            |             | 2      |
|                      |                             |      |                |        |                | Negative | Women  |        |            |             | 17     |
| Ouhoumane N          | Cancer Epidemiol            | 2013 | Canada         | Biopsy | PGMY09/11      | Positive | Men    |        |            |             | 3      |
|                      |                             |      |                |        |                | Negative | Men    |        |            |             | 22     |
|                      |                             |      |                |        |                | Negative | Women  |        |            |             | 42     |
|                      |                             |      |                |        |                | Unknown  | Men    |        |            |             | 8      |

|                 |                                  |      |        |        |                    |          |       |             |             |            |            |
|-----------------|----------------------------------|------|--------|--------|--------------------|----------|-------|-------------|-------------|------------|------------|
|                 |                                  |      |        |        |                    | Unknown  | Women |             |             |            | 21         |
| Sahasrabudde VV | J Infect Dis                     | 2013 | USA    | Cells  | PGMY09/11          | Positive | Men   | 99          | 104         |            |            |
| Steinau M       | J Low Genit Tract Dis            | 2013 | USA    | Biopsy | PGMY09/11; SPF10   | Unknown  | Men   |             |             |            | 48         |
|                 |                                  |      |        |        |                    | Unknown  | Women |             |             |            | 85         |
| Lowe B          | Diagn Mol Pathol                 | 2012 | USA    | Cells  | GP5+/6+            | Positive | Men   | 42          | 70          | 7          |            |
|                 |                                  |      |        |        |                    | Negative | Men   | 74          | 68          | 3          |            |
|                 |                                  |      |        |        |                    | Positive | Women |             |             | 1          |            |
|                 |                                  |      |        |        |                    | Negative | Women | 6           | 1           |            |            |
| Schlecht NF     | PLoS One                         | 2012 | USA    | Cells  | MY09/11            | Negative | Women | 168         | 27          |            |            |
| Gilbert M       | Sex Transm Dis                   | 2011 | Canada | Cells  | PGMY09/11          | Positive | Men   | 13          | 10          | 13         |            |
|                 |                                  |      |        |        |                    | Negative | Men   | 54          | 17          | 9          |            |
| Conley L        | J Infect Dis                     | 2010 | USA    | Cells  | PGMY09/11          | Positive | Men   | 239         | 182         | 49         |            |
|                 |                                  |      |        |        |                    | Positive | Women | 97          | 45          | 8          |            |
| Park IU         | Gynecol Oncol                    | 2009 | USA    | Cells  | MY09/11            | Negative | Women | 79          | 6           | 2          |            |
| Salit IE        | Cancer Epidemiol Biomarkers Prev | 2009 | Canada | Cells  | PGMY09/11; MY09/11 | Positive | Men   |             |             | 74         |            |
| Berry JM        | Dis Colon Rectum                 | 2009 | USA    | Cells  | MY09/11            | Positive | Men   |             | 5           | 15         |            |
|                 |                                  |      |        |        |                    | Negative | Men   |             | 8           | 20         |            |
| Gohy L          | J Acquir Immune Defic Syndr      | 2008 | Canada | Biopsy | PGMY09/11          | Positive | Men   |             | 60          | 62         |            |
| Coutlee F       | J Clin Microbiol                 | 2006 | Canada | Cells  | PGMY09/11          | Positive | Men   |             | 67          | 66         |            |
| Daling JR       | Cancer                           | 2004 | USA    | Biopsy | MY09/11            | Unknown  | Men   |             |             |            | 51         |
|                 |                                  |      |        |        |                    | Unknown  | Women |             |             |            | 99         |
| Moscicki AB     | Aids                             | 2003 | USA    | Cells  | MYO9/11; HMB01     | Positive | Men   | 25          | 40          | 19         |            |
|                 |                                  |      |        |        |                    | Negative | Men   | 29          | 8           |            |            |
|                 |                                  |      |        |        |                    | Positive | Women | 156         | 63          | 14         |            |
|                 |                                  |      |        |        |                    | Negative | Women | 111         | 11          | 2          |            |
| Critchlow CW    | Aids                             | 1998 | USA    | Cells  | MY09/11            | Positive | Men   | 133         | 234         | 26         |            |
|                 |                                  |      |        |        |                    | Negative | Men   | 221         | 112         | 8          |            |
| Shroyer KR      | Am J Clin Pathol                 | 1995 | USA    | Biopsy | MY09/11            | Unknown  | Men   |             |             |            | 2          |
|                 |                                  |      |        |        |                    | Unknown  | Women |             |             |            | 8          |
| Zaki SR         | Am J Pathol                      | 1992 | USA    | Biopsy | Other              | Positive | Men   |             |             |            | 1          |
|                 |                                  |      |        |        |                    | Unknown  | Men   |             |             |            | 1          |
|                 |                                  |      |        |        |                    | Unknown  | Women |             |             |            | 6          |
| <b>Subtotal</b> |                                  |      |        |        |                    |          |       | <b>3242</b> | <b>2313</b> | <b>767</b> | <b>663</b> |
| <b>Europe</b>   |                                  |      |        |        |                    |          |       |             |             |            |            |
| Lorincz AT      | Oncotarget                       | 2017 | UK     | Biopsy | Other              | Positive | Men   | 32          | 44          | 3          |            |
|                 |                                  |      |        |        |                    | Negative | Men   | 8           | 5           | 1          |            |



|                   |                              |      |                                                                                                |        |                     |          |       |     |     |    |     |
|-------------------|------------------------------|------|------------------------------------------------------------------------------------------------|--------|---------------------|----------|-------|-----|-----|----|-----|
|                   |                              |      |                                                                                                |        |                     | Positive | Women |     |     | 7  |     |
|                   |                              |      |                                                                                                |        |                     | Negative | Women |     | 3   | 8  | 1   |
| Schofield AM      | Aids                         | 2016 | UK                                                                                             | Cells  | cobas; PapilloCheck | Positive | Men   | 33  | 95  | 63 | 3   |
|                   |                              |      |                                                                                                |        |                     | Negative | Men   | 28  | 28  | 24 |     |
| Padilla-Espana L  | Enferm Infecc Microbiol Clin | 2016 | Spain                                                                                          | Cells  | CLART2HPV           | Positive | Men   | 3   | 30  | 21 |     |
|                   |                              |      |                                                                                                |        |                     | Negative | Men   | 1   | 14  | 7  |     |
|                   |                              |      |                                                                                                |        |                     | Positive | Women |     | 2   | 1  |     |
|                   |                              |      |                                                                                                |        |                     | Negative | Women | 2   | 7   | 4  |     |
| Fuchs M           | Br J Dermatol                | 2016 | Germany                                                                                        | Cells  | A6/A8               | Positive | Men   | 180 | 232 | 71 |     |
| Herfs M           | J Pathol                     | 2016 | Belgium                                                                                        | Biopsy | Other               | Positive | Men   |     |     |    | 9   |
|                   |                              |      |                                                                                                |        |                     | Negative | Men   |     |     |    | 35  |
|                   |                              |      |                                                                                                |        |                     | Positive | Women |     |     |    | 1   |
|                   |                              |      |                                                                                                |        |                     | Negative | Women |     |     |    | 54  |
| Barroca HM        | Porto Biomed J               | 2016 | Portugal                                                                                       | Cells  | cobas               | Positive | Men   | 25  | 34  | 4  |     |
| Burgos J          | Aids                         | 2015 | Spain                                                                                          | Cells  | CLART2HPV           | Positive | Men   | 189 | 266 | 16 |     |
| Alemaný L         | Int J Cancer                 | 2015 | Bosnia-Herzegovina, Czech Republic, France, Germany, Poland, Portugal, Slovenia, Spain, and UK | Biopsy | SPF10               | Unknown  | Men   |     |     |    | 54  |
|                   |                              |      |                                                                                                |        |                     | Unknown  | Women |     |     |    | 111 |
| Arana R           | Colorectal Dis               | 2015 | France                                                                                         | Biopsy | SPF10               | Positive | Men   |     |     | 10 | 9   |
|                   |                              |      |                                                                                                |        |                     | Negative | Men   |     |     | 2  | 3   |
|                   |                              |      |                                                                                                |        |                     | Positive | Women |     |     |    | 1   |
|                   |                              |      |                                                                                                |        |                     | Negative | Women |     |     | 5  | 4   |
| Baricevic I       | Eur J Cancer                 | 2015 | UK                                                                                             | Biopsy | E6/E7, L1 or L1/L2  | Positive | Men   |     |     |    | 5   |
| Borghetti A       | J Infect                     | 2015 | Italy                                                                                          | Cells  | PapilloCheck        | Positive | Men   | 79  | 14  |    | 2   |
|                   |                              |      |                                                                                                |        |                     | Positive | Women | 18  | 1   |    |     |
| Garbuglia AR      | J Clin Virol                 | 2015 | Italy                                                                                          | Cells  | MY09/11             | Positive | Men   | 104 | 33  | 12 |     |
|                   |                              |      |                                                                                                |        |                     | Negative | Men   | 6   | 2   |    |     |
| Heard I           | Clin Infect Dis              | 2015 | France                                                                                         | Cells  | PGMY09/11           | Positive | Women | 98  | 25  | 28 | 1   |
| Hidalgo-Tenorio C | PLoS One                     | 2015 | Spain                                                                                          | Cells  | Other               | Positive | Men   | 75  | 112 | 9  |     |
| Gosens K          | IANS conference abstract     | 2015 | Netherlands                                                                                    | Biopsy | SPF10               | Positive | Men   |     |     |    | 20  |
| Alexandrou A      | Acta Gastroenterol Belg      | 2014 | Greece                                                                                         | Biopsy | CLART2HPV           | Negative | Men   |     |     |    | 5   |
|                   |                              |      |                                                                                                |        |                     | Negative | Women |     |     |    | 6   |
| Casadei Gardini A | PLoS One                     | 2014 | Italy                                                                                          | Biopsy | GP5+/6+             | Positive | Men   |     |     |    | 6   |
| Richel O          | J Infect Dis                 | 2014 | Netherlands                                                                                    | Biopsy | SPF10               | Positive | Men   |     |     | 21 |     |
| Darwich L         | Dis Colon Rectum             | 2013 | Spain                                                                                          | Cells  | F-HPV               | Positive | Men   | 297 | 139 | 69 |     |
| Garcia-Espinosa B | Diagn Pathol                 | 2013 | Spain                                                                                          | Biopsy | GP5+/6+             | Positive | Men   |     |     |    | 1   |
| Kim S             | Ann Oncol                    | 2013 | France                                                                                         | Biopsy | SPF10               | Negative | Men   |     |     |    | 2   |

|                  |                                          |      |                |        |                      |          |       |     |     |    |     |
|------------------|------------------------------------------|------|----------------|--------|----------------------|----------|-------|-----|-----|----|-----|
|                  |                                          |      |                |        |                      | Negative | Women |     |     |    | 4   |
| Marchetti G      | J Sex Transm Dis                         | 2013 | Italy          | Cells  | MY09/11; PU-1M/PU-2R | Positive | Men   | 84  | 72  | 11 |     |
| Torres M         | J Clin Microbiol                         | 2013 | Spain          | Cells  | PGMY09/11            | Positive | Men   | 441 | 465 | 44 |     |
| Valmary-Degano S | Hum Pathol                               | 2013 | France         | Biopsy | SPF10                | Unknown  | Men   |     |     |    | 23  |
|                  |                                          |      |                |        |                      | Unknown  | Women |     |     |    | 50  |
| D'Hauwers KW     | Eur J Obstet Gynecol Reprod Biol         | 2012 | Belgium        | Cells  | E6/E7                | Negative | Women | 83  | 10  |    |     |
| Pierangeli A     | J Infect                                 | 2012 | Italy          | Cells  | Other                | Negative | Women | 71  | 34  |    |     |
| Dona MG          | BMC Cance                                | 2012 | Italy          | Cells  | PGMY09/11            | Negative | Men   | 210 | 89  |    |     |
| Etienney I       | Cancer                                   | 2012 | France         | Cells  | MY09/11; PGMY09/11   | Positive | Men   |     |     | 3  | 3   |
|                  |                                          |      |                |        |                      | Negative | Men   | 95  | 17  | 5  |     |
|                  |                                          |      |                |        |                      | Positive | Women |     |     | 2  |     |
|                  |                                          |      |                |        |                      | Negative | Women | 91  | 28  | 9  |     |
| Lanoix JP        | AIDS Patient Care STDS                   | 2012 | France         | Cells  | SPF10                | Positive | Men   | 12  | 3   |    |     |
| Abramowitz L     | Int J Cancer                             | 2011 | France         | Biopsy | SPF10                | Positive | Men   |     |     |    | 45  |
|                  |                                          |      |                |        |                      | Negative | Men   |     |     |    | 13  |
|                  |                                          |      |                |        |                      | Positive | Women |     |     |    | 5   |
|                  |                                          |      |                |        |                      | Negative | Women |     |     |    | 33  |
|                  |                                          |      |                |        |                      | Unknown  | Men   |     |     |    | 79  |
|                  |                                          |      |                |        |                      | Unknown  | Women |     |     |    | 187 |
| Komlos KF        | Acta Dermatovenerol Alp Pannonica Adriat | 2011 | Slovenia       | Biopsy | SPF10                | Unknown  | Men   |     |     |    | 8   |
|                  |                                          |      |                |        |                      | Unknown  | Women |     |     |    | 9   |
| Yaghoobi M       | Colorectal Dis                           | 2011 | France         | Biopsy | Other                | Positive | Men   |     |     |    | 4   |
|                  |                                          |      |                |        |                      | Negative | Women |     |     |    | 1   |
| Damay A          | J Med Virol                              | 2010 | France         | Cells  | PapilloCheck         | Positive | Men   | 34  | 29  | 3  |     |
| Kreuter A        | Br J Dermatol                            | 2010 | Germany        | Biopsy | A5/A10; A6/A8        | Positive | Men   |     |     |    | 9   |
| Orlando G        | Vaccine                                  | 2009 | Italy          | Cells  | MY09/11              | Positive | Men   | 31  | 176 | 32 | 3   |
|                  |                                          |      |                |        |                      | Negative | Men   | 4   | 14  | 2  |     |
| Tachezy R        | APMIS                                    | 2007 | Czech Republic | Biopsy | GP5+/6+              | Unknown  | Men   |     |     |    | 4   |
|                  |                                          |      |                |        |                      | Unknown  | Women |     |     |    | 18  |
| HAMPL M          | JCRCO                                    | 2007 | Germany        | Biopsy | GP5+/6+; MY09/11     | Negative | Women |     | 1   | 22 |     |
| Varnai AD        | Int J Colorectal Dis                     | 2006 | Germany        | Biopsy | GP5+/6+; MY09/11     | Unknown  | Men   |     |     |    | 13  |
|                  |                                          |      |                |        |                      | Unknown  | Women |     |     |    | 34  |
| Kreuter A        | J Am Acad Dermatol                       | 2005 | Germany        | Cells  | A5/A10; A6/A8        | Positive | Men   |     | 4   | 16 |     |
| Piketty C        | Ann Intern Med                           | 2003 | France         | Cells  | MY09/11              | Positive | Men   | 7   | 32  | 8  |     |
| Indinnimeo M     | Tech Coloproctol                         | 1999 | Italy          | Biopsy | TS                   | Unknown  | Men   |     |     |    | 2   |
|                  |                                          |      |                |        |                      | Unknown  | Women |     |     |    | 12  |

|                                |                                  |      |                                                                 |        |                     |          |       |             |             |             |            |             |
|--------------------------------|----------------------------------|------|-----------------------------------------------------------------|--------|---------------------|----------|-------|-------------|-------------|-------------|------------|-------------|
| Frisch M                       | N Engl J Med                     | 1997 | Denmark and Sweden                                              | Biopsy | GP5+/6+             | Unknown  | Men   |             |             |             | 304        |             |
|                                |                                  |      |                                                                 |        |                     | Unknown  | Women |             |             |             | 84         |             |
| Heselmeyer K                   | Br J Cancer                      | 1997 | Sweden                                                          | Biopsy | MY09/11             | Unknown  | Men   |             |             |             | 5          |             |
|                                |                                  |      |                                                                 |        |                     | Unknown  | Women |             |             |             | 11         |             |
| Vincent-Salomon A              | Mod Pathol                       | 1996 | France                                                          | Biopsy | TS                  | Unknown  | Men   |             |             |             | 8          |             |
|                                |                                  |      |                                                                 |        |                     | Unknown  | Women |             |             |             | 19         |             |
| <b>Subtotal</b>                |                                  |      |                                                                 |        |                     |          |       |             | <b>2301</b> | <b>2056</b> | <b>586</b> | <b>1324</b> |
| <b><u>Latin America</u></b>    |                                  |      |                                                                 |        |                     |          |       |             |             |             |            |             |
| Limia CM                       | Infect Agent Cancer              | 2017 | Cuba                                                            | Cells  | LCR/E6/E7           | Positive | Men   | 3           | 48          | 5           |            |             |
| Scapulatempo-Neto C            | Oncol Lett                       | 2017 | Brazil                                                          | Biopsy | TS                  | Unknown  | Men   |             |             |             | 22         |             |
|                                |                                  |      |                                                                 |        |                     | Unknown  | Women |             |             |             | 48         |             |
| Ortiz AP                       | Galenus                          | 2017 | Puerto Rico                                                     | Cells  | cobas               | Positive | Men   | 18          | 64          | 89          |            |             |
|                                |                                  |      |                                                                 |        |                     | Negative | Men   | 8           | 13          | 7           |            |             |
|                                |                                  |      |                                                                 |        |                     | Positive | Women | 9           | 33          | 47          |            |             |
|                                |                                  |      |                                                                 |        |                     | Negative | Women | 4           | 8           | 11          |            |             |
| Beachler DC                    | J Natl Cancer Inst               | 2016 | Costa Rica                                                      | Cells  | SPF10               | Negative | Women | 883         | 67          | 8           |            |             |
| Nicol AF                       | J Acquir Immune Defic Syndr      | 2016 | Brazil                                                          | Biopsy | L1; GP5+/6+         | Positive | Men   |             | 11          | 8           |            |             |
|                                |                                  |      |                                                                 |        |                     | Positive | Women |             | 6           | 9           |            |             |
| Aleman L                       | Int J Cancer                     | 2015 | Chile, Colombia, Ecuador, Guatemala, Honduras, Mexico, Paraguay | Biopsy | SPF10               | Unknown  | Men   |             |             |             | 31         |             |
|                                |                                  |      |                                                                 |        |                     | Unknown  | Women |             |             |             | 121        |             |
| Cambou MC                      | AIDS Patient Care STDS           | 2015 | Brazil                                                          | Cells  | PapilloCheck        | Positive | Women | 551         | 188         | 42          |            |             |
| Tso FK                         | Genet Mol Res                    | 2015 | Brazil                                                          | Cells  | cobas; PapilloCheck | Positive | Women | 21          | 13          | 8           |            |             |
|                                |                                  |      |                                                                 |        |                     | Negative | Women | 38          | 16          | 2           |            |             |
| Melo VH                        | J Low Genit Tract Dis            | 2014 | Brazil                                                          | Cells  | MY09/11             | Positive | Men   | 237         | 119         | 24          |            |             |
| Maia LB                        | Indian J Sex Transm Dis          | 2013 | Brazil                                                          | Cells  | PapilloCheck        | Positive | Men   | 11          | 10          | 2           |            |             |
|                                |                                  |      |                                                                 |        |                     | Positive | Women | 7           | 3           |             |            |             |
| Heraclio S                     | Acta Cytol                       | 2011 | Brazil                                                          | Cells  | MY09/11; GP5+/6+    | Positive | Women |             | 5           | 8           | 1          |             |
|                                |                                  |      |                                                                 |        |                     | Negative | Women |             | 70          | 50          | 2          |             |
| <b>Subtotal</b>                |                                  |      |                                                                 |        |                     |          |       | <b>1790</b> | <b>674</b>  | <b>320</b>  | <b>225</b> |             |
| <b><u>Asia and Oceania</u></b> |                                  |      |                                                                 |        |                     |          |       |             |             |             |            |             |
| Yaegashi H                     | J Infect Chemother               | 2017 | Japan                                                           | Cells  | Other               | Positive | Men   | 23          | 92          | 7           |            |             |
| Machalek DA                    | Cancer Epidemiol Biomarkers Prev | 2016 | Australia                                                       | Cells  | PGMY09/11           | Positive | Men   | 45          | 57          | 113         |            |             |
|                                |                                  |      |                                                                 |        |                     | Negative | Men   | 121         | 93          | 160         |            |             |
| Ruanpeng D                     | PLoS One                         | 2016 | Thailand                                                        | Cells  | PGMY09/11           | Positive | Men   | 10          | 36          | 2           |            |             |
|                                |                                  |      |                                                                 |        |                     | Negative | Men   | 74          | 36          |             |            |             |

|                      |                            |      |                                         |        |                    |          |       |             |             |             |             |
|----------------------|----------------------------|------|-----------------------------------------|--------|--------------------|----------|-------|-------------|-------------|-------------|-------------|
| Shwe MM              | Acta Med Okayama           | 2016 | Japan                                   | Biopsy | pU-1M/pU-2R        | Unknown  | Women |             |             |             | 5           |
| Lee CH               | PLoS One                   | 2016 | Korea                                   | Cells  | Other              | Positive | Men   | 131         | 69          | 1           |             |
| Simpson S Jr         | Cancer Epidemiol           | 2016 | Australia                               | Cells  | PGMY09/11          | Negative | Women | 74          | 14          | 35          |             |
| Alemanly L           | Int J Cancer               | 2015 | Australia, Bangladesh, India, and Korea | Biopsy | SPF10              | Unknown  | Men   |             |             |             | 21          |
|                      |                            |      |                                         |        |                    | Unknown  | Women |             |             |             | 31          |
| Cheng SH             | Int J Clin Oncol           | 2015 | Taiwan                                  | Cells  | PGMY09/11          | Positive | Men   | 412         | 119         | 11          | 1           |
| Phanuphak N          | PLoS One                   | 2013 | Thailand                                | Cells  | PGMY09/11          | Positive | Men   | 101         | 13          |             |             |
|                      |                            |      |                                         |        |                    | Negative | Men   | 104         | 14          | 3           |             |
| Yang Y               | PLoS One                   | 2012 | China                                   | Cells  | Other              | Positive | Men   | 55          | 19          |             |             |
| Yhim HY              | Int J Cancer               | 2011 | Korea                                   | Biopsy | Other              | Negative | Men   |             |             |             | 22          |
|                      |                            |      |                                         |        |                    | Negative | Women |             |             |             | 25          |
| Tsai TF              | Sex Transm Dis             | 2008 | China                                   | Biopsy | MY09/GP6+; GP5+/6+ | Negative | Men   |             |             |             | 7           |
|                      |                            |      |                                         |        |                    | Negative | Women |             |             |             | 5           |
| Kagawa R             | Surg Today                 | 2006 | Japan                                   | Biopsy | Other              | Unknown  | Men   |             |             |             | 2           |
|                      |                            |      |                                         |        |                    | Unknown  | Women |             |             |             | 4           |
| <b>Subtotal</b>      |                            |      |                                         |        |                    |          |       | <b>1150</b> | <b>562</b>  | <b>332</b>  | <b>123</b>  |
| <b><u>Africa</u></b> |                            |      |                                         |        |                    |          |       |             |             |             |             |
| Mbulawa Z            | Am J Clin Pathol           | 2017 | South Africa                            | Cells  | Xpert              | Positive | Women | 51          | 125         | 19          |             |
| Mpunga T             | AORTIC conference abstract | 2017 | Rwanda                                  | Biopsy | GP5+/6+            | Positive | Women |             |             |             | 2           |
| Alemanly L           | Int J Cancer               | 2015 | Mali, Nigeria, and Senegal              | Biopsy | SPF10              | Unknown  | Men   |             |             |             | 12          |
|                      |                            |      |                                         |        |                    | Unknown  | Women |             |             |             | 9           |
| <b>Subtotal</b>      |                            |      |                                         |        |                    |          |       | <b>51</b>   | <b>125</b>  | <b>19</b>   | <b>23</b>   |
| <b>Total</b>         |                            |      |                                         |        |                    |          |       | <b>8534</b> | <b>5730</b> | <b>2024</b> | <b>2358</b> |

\*Low-grade diagnosis is defined as atypical squamous cells of undetermined significance, low-grade squamous intraepithelial lesion, or anal intraepithelial neoplasia grade 1.

†High-grade diagnosis is defined as high-grade squamous intraepithelial lesion, atypical squamous cells-cannot exclude high-grade squamous intraepithelial lesion, or anal intraepithelial neoplasia grade 2 or 3.

**Appendix Table 2: Prevalence of single and multiple infections of human papillomavirus (HPV) types\* in HPV-positive anal cancer by HIV status (sensitivity analysis showing known HIV-negative and HIV-unknown anal cancers separately)**

| HPV type                     | HIV-negative |              |          |            | HIV-unknown |              |          |            | HIV-positive |              |          |            |
|------------------------------|--------------|--------------|----------|------------|-------------|--------------|----------|------------|--------------|--------------|----------|------------|
|                              | N            | Prevalence % | Single % | Multiple % | N           | Prevalence % | Single % | Multiple % | N            | Prevalence % | Single % | Multiple % |
| HPV16                        | 320          | 89.7%        | 81.3%    | 8.4%       | 1234        | 84.8%        | 77.5%    | 7.3%       | 144          | 66.7%        | 43.8%    | 22.9%      |
| HPV33                        | 196          | 2.0%         | 1.5%     | 0.5%       | 1173        | 3.4%         | 2.5%     | 0.9%       | 130          | 9.2%         | 2.3%     | 6.9%       |
| HPV18                        | 320          | 4.1%         | 2.8%     | 1.3%       | 1234        | 4.3%         | 2.3%     | 2.0%       | 144          | 14.6%        | 2.1%     | 12.5%      |
| HPV6                         | 192          | 4.1%         | 1.0%     | 3.1%       | 1223        | 3.8%         | 2.2%     | 1.6%       | 124          | 6.4%         | 2.4%     | 4.0%       |
| HPV58                        | 195          | 3.6%         | 3.1%     | 0.5%       | 1003        | 1.6%         | 1.2%     | 0.4%       | 123          | 0.8%         | 0.0%     | 0.8%       |
| HPV35                        | 195          | 0.5%         | 0.5%     | 0.0%       | 1137        | 1.0%         | 0.9%     | 0.1%       | 123          | 0.0%         | 0.0%     | 0.0%       |
| HPV11                        | 192          | 2.6%         | 0.0%     | 2.6%       | 1223        | 2.6%         | 0.8%     | 1.8%       | 124          | 8.1%         | 0.8%     | 7.3%       |
| HPV31                        | 196          | 1.0%         | 1.0%     | 0.0%       | 1142        | 1.5%         | 0.8%     | 0.7%       | 129          | 4.7%         | 1.6%     | 3.1%       |
| HPV52                        | 195          | 3.6%         | 1.0%     | 2.6%       | 1003        | 1.4%         | 0.7%     | 0.7%       | 123          | 9.7%         | 1.6%     | 8.1%       |
| HPV45                        | 195          | 0.5%         | 0.0%     | 0.5%       | 1134        | 0.8%         | 0.5%     | 0.3%       | 125          | 6.4%         | 2.4%     | 4.0%       |
| HPV39                        | 195          | 0.0%         | 0.0%     | 0.0%       | 995         | 0.7%         | 0.2%     | 0.5%       | 123          | 6.5%         | 0.8%     | 5.7%       |
| HPV56                        | 195          | 1.5%         | 1.0%     | 0.5%       | 995         | 0.3%         | 0.2%     | 0.1%       | 123          | 0.8%         | 0.0%     | 0.8%       |
| HPV68                        | 195          | 0.0%         | 0.0%     | 0.0%       | 995         | 0.4%         | 0.2%     | 0.2%       | 123          | 8.1%         | 0.0%     | 8.1%       |
| HPV59                        | 195          | 0.0%         | 0.0%     | 0.0%       | 995         | 0.2%         | 0.1%     | 0.1%       | 123          | 4.1%         | 0.0%     | 4.1%       |
| HPV51                        | 195          | 1.0%         | 0.0%     | 1.0%       | 995         | 0.9%         | 0.0%     | 0.9%       | 123          | 6.5%         | 0.8%     | 5.7%       |
| Any HPV                      | 196          | 100.0%       | 87.8%    | 12.2%      | 1234        | 99.5%        | 89.7%    | 9.8%       | 130          | 98.4%        | 56.9%    | 41.5%      |
| HPV16/18                     | 191          | 89.6%        | 81.2%†   | 8.4%‡      | 438         | 86.9%        | 78.5%†   | 8.4%‡      | 118          | 73.8%        | 49.2%†   | 24.6%‡     |
| HPV6/11/16/18                | 191          | 91.1%        | 86.9%†   | 4.2%‡      | 438         | 92.4%        | 85.6%†   | 6.8%‡      | 118          | 77.1%        | 55.9%†   | 21.2%‡     |
| HPV6/11/16/18/31/33/45/52/58 | 191          | 97.9%        | 96.3%†   | 1.6%‡      | 438         | 98.4%        | 94.7%†   | 3.7%‡      | 118          | 92.3%        | 75.4%†   | 16.9%‡     |

\*In order of prevalence of single infection in HIV-unknown anal cancer.

†Single = in the absence of any other any other HPV type(s).

‡Multiple = in the presence of any other HPV type(s).

**Appendix Table 3: Prevalence of human papillomavirus (HPV) types in HPV-positive men by anal diagnosis and HIV status**

| HPV type | HIV      | Normal<br>N (%) | Low-grade*<br>N (%) | High-grade†<br>N (%) | Cancer‡<br>N (%) |
|----------|----------|-----------------|---------------------|----------------------|------------------|
| HPV6     | Negative | 727 (11.4%)     | 402 (27.1%)         | 75 (22.7%)           | 687 (5.1%)       |
|          | Positive | 2500 (17.9%)    | 2779 (28.6%)        | 800 (20.4%)          | 122 (9.0%)       |
| HPV11    | Negative | 727 (6.6%)      | 402 (15.2%)         | 75 (13.3%)           | 687 (3.2%)       |
|          | Positive | 2500 (11.8%)    | 2779 (21.2%)        | 800 (15.1%)          | 122 (6.6%)       |
| HPV16    | Negative | 972 (20.6%)     | 707 (27.4%)         | 317 (46.7%)          | 780 (81.8%)      |
|          | Positive | 2860 (26.4%)    | 3454 (36.8%)        | 1129 (50.5%)         | 136 (66.9%)      |
| HPV18    | Negative | 972 (6.1%)      | 700 (10.6%)         | 303 (16.5%)          | 780 (5.1%)       |
|          | Positive | 2860 (12.3%)    | 3449 (18.3%)        | 1115 (19.6%)         | 136 (14.0%)      |
| HPV31    | Negative | 800 (5.5%)      | 480 (7.3%)          | 242 (11.2%)          | 668 (1.3%)       |
|          | Positive | 2661 (10.3%)    | 2984 (14.0%)        | 945 (17.9%)          | 122 (4.9%)       |
| HPV33    | Negative | 800 (4.1%)      | 480 (6.0%)          | 242 (11.6%)          | 674 (4.6%)       |
|          | Positive | 2661 (8.9%)     | 2984 (11.3%)        | 945 (16.2%)          | 123 (8.9%)       |
| HPV35    | Negative | 800 (2.9%)      | 480 (3.8%)          | 242 (5.4%)           | 384 (0.5%)       |
|          | Positive | 2579 (7.7%)     | 2934 (11.2%)        | 940 (12.0%)          | 111 (0.0%)       |
| HPV39    | Negative | 806 (6.2%)      | 488 (10.2%)         | 242 (11.2%)          | 338 (0.3%)       |
|          | Positive | 2586 (9.2%)     | 2969 (12.6%)        | 957 (10.9%)          | 111 (7.2%)       |
| HPV45    | Negative | 931 (6.4%)      | 584 (9.8%)          | 250 (14.4%)          | 384 (1.3%)       |
|          | Positive | 2777 (11.3%)    | 3247 (14.9%)        | 988 (13.3%)          | 118 (5.9%)       |
| HPV51    | Negative | 806 (9.3%)      | 488 (11.7%)         | 242 (15.3%)          | 338 (1.2%)       |
|          | Positive | 2586 (12.3%)    | 2969 (15.2%)        | 957 (17.0%)          | 111 (7.2%)       |
| HPV52    | Negative | 806 (12.7%)     | 488 (14.5%)         | 242 (14.0%)          | 340 (3.8%)       |
|          | Positive | 2586 (17.0%)    | 2969 (17.9%)        | 957 (16.4%)          | 116 (9.5%)       |
| HPV56    | Negative | 806 (4.2%)      | 488 (7.4%)          | 242 (5.0%)           | 338 (1.5%)       |
|          | Positive | 2586 (6.9%)     | 2969 (8.4%)         | 957 (8.6%)           | 111 (0.9%)       |
| HPV58    | Negative | 806 (7.1%)      | 488 (8.4%)          | 242 (10.3%)          | 340 (1.5%)       |
|          | Positive | 2589 (14.3%)    | 3005 (14.7%)        | 962 (20.1%)          | 116 (1.7%)       |
| HPV59    | Negative | 800 (6.9%)      | 480 (7.9%)          | 242 (14.9%)          | 338 (0.3%)       |
|          | Positive | 2579 (12.0%)    | 2934 (14.9%)        | 940 (13.3%)          | 111 (3.6%)       |
| HPV68    | Negative | 800 (6.8%)      | 480 (5.8%)          | 242 (7.9%)           | 338 (0.9%)       |
|          | Positive | 2579 (9.2%)     | 2934 (10.7%)        | 878 (10.5%)          | 110 (8.2%)       |

\*Low-grade diagnosis is defined as atypical squamous cells of undetermined significance, low-grade squamous intraepithelial lesion, or anal intraepithelial neoplasia grade 1.

†High-grade diagnosis is defined as high-grade squamous intraepithelial lesion, atypical squamous cells-cannot exclude high-grade squamous intraepithelial lesion, or anal intraepithelial neoplasia grade 2 or 3.

‡Anal cancers of unknown HIV status are assumed to be HIV-negative.

**Appendix Table 4: Prevalence of human papillomavirus (HPV) types in HPV-positive women by anal diagnosis and HIV status**

| HPV type | HIV      | Normal<br>N (%) | Low-grade*<br>N (%) | High-grade†<br>N (%) | Cancer‡<br>N (%) |
|----------|----------|-----------------|---------------------|----------------------|------------------|
| HPV6     | Negative | 576 (6.3%)      | 173 (27.7%)         | 117 (17.9%)          | 961 (2.4%)       |
|          | Positive | 503 (10.7%)     | 305 (23.9%)         | 110 (18.2%)          | 12 (0.0%)        |
| HPV11    | Negative | 576 (1.2%)      | 173 (8.7%)          | 117 (0.9%)           | 961 (1.5%)       |
|          | Positive | 503 (2.4%)      | 305 (11.8%)         | 110 (5.5%)           | 12 (16.7%)       |
| HPV16    | Negative | 743 (13.9%)     | 218 (19.7%)         | 160 (56.3%)          | 1149 (88.1%)     |
|          | Positive | 788 (17.0%)     | 511 (25.2%)         | 216 (36.1%)          | 13 (69.2%)       |
| HPV18    | Negative | 743 (5.8%)      | 218 (7.3%)          | 160 (5.6%)           | 1149 (4.4%)      |
|          | Positive | 771 (6.9%)      | 463 (17.3%)         | 202 (17.8%)          | 13 (15.4%)       |
| HPV31    | Negative | 719 (7.6%)      | 205 (7.8%)          | 142 (12.0%)          | 903 (1.3%)       |
|          | Positive | 711 (8.6%)      | 389 (9.0%)          | 145 (11.7%)          | 12 (0.0%)        |
| HPV33    | Negative | 719 (3.1%)      | 205 (5.9%)          | 142 (10.6%)          | 928 (3.7%)       |
|          | Positive | 711 (4.8%)      | 389 (10.3%)         | 145 (12.4%)          | 12 (8.3%)        |
| HPV35    | Negative | 719 (3.1%)      | 205 (2.9%)          | 142 (2.1%)           | 841 (1.0%)       |
|          | Positive | 693 (4.6%)      | 388 (7.2%)          | 145 (9.7%)           | 12 (0.0%)        |
| HPV39    | Negative | 740 (7.6%)      | 209 (7.2%)          | 144 (2.1%)           | 745 (0.4%)       |
|          | Positive | 749 (5.9%)      | 437 (11.0%)         | 157 (10.8%)          | 12 (0.0%)        |
| HPV45    | Negative | 740 (3.2%)      | 209 (3.8%)          | 144 (3.5%)           | 838 (0.5%)       |
|          | Positive | 767 (7.6%)      | 438 (11.6%)         | 157 (10.8%)          | 12 (8.3%)        |
| HPV51    | Negative | 740 (12.0%)     | 209 (10.0%)         | 144 (9.0%)           | 745 (0.9%)       |
|          | Positive | 749 (8.5%)      | 437 (11.0%)         | 157 (10.8%)          | 12 (8.3%)        |
| HPV52    | Negative | 740 (9.6%)      | 209 (6.7%)          | 144 (4.2%)           | 751 (1.1%)       |
|          | Positive | 749 (6.8%)      | 437 (13.5%)         | 157 (11.5%)          | 12 (8.3%)        |
| HPV56    | Negative | 740 (6.2%)      | 209 (4.8%)          | 144 (1.4%)           | 745 (0.1%)       |
|          | Positive | 749 (7.5%)      | 437 (12.1%)         | 157 (8.9%)           | 12 (0.0%)        |
| HPV58    | Negative | 740 (5.7%)      | 209 (4.8%)          | 144 (4.9%)           | 751 (1.9%)       |
|          | Positive | 749 (9.3%)      | 437 (13.3%)         | 157 (22.3%)          | 12 (0.0%)        |
| HPV59    | Negative | 719 (3.6%)      | 205 (2.9%)          | 142 (4.2%)           | 745 (0.1%)       |
|          | Positive | 693 (6.2%)      | 388 (8.8%)          | 145 (6.2%)           | 12 (8.3%)        |
| HPV68    | Negative | 651 (5.4%)      | 194 (2.1%)          | 140 (1.4%)           | 745 (0.1%)       |
|          | Positive | 485 (12.6%)     | 304 (13.5%)         | 111 (11.7%)          | 12 (8.3%)        |

\*Low-grade diagnosis is defined as atypical squamous cells of undetermined significance, low-grade squamous intraepithelial lesion, or anal intraepithelial neoplasia grade 1.

†High-grade diagnosis is defined as high-grade squamous intraepithelial lesion, atypical squamous cells-cannot exclude high-grade squamous intraepithelial lesion, or anal intraepithelial neoplasia grade 2 or 3.

‡Anal cancers of unknown HIV status are assumed to be HIV-negative.

## Appendix Figures

**Appendix Figure 1: Overall human papillomavirus (HPV) prevalence by gender, anal diagnosis\* and HIV status (sensitivity analysis including known HIV-negative anal cancers only)**

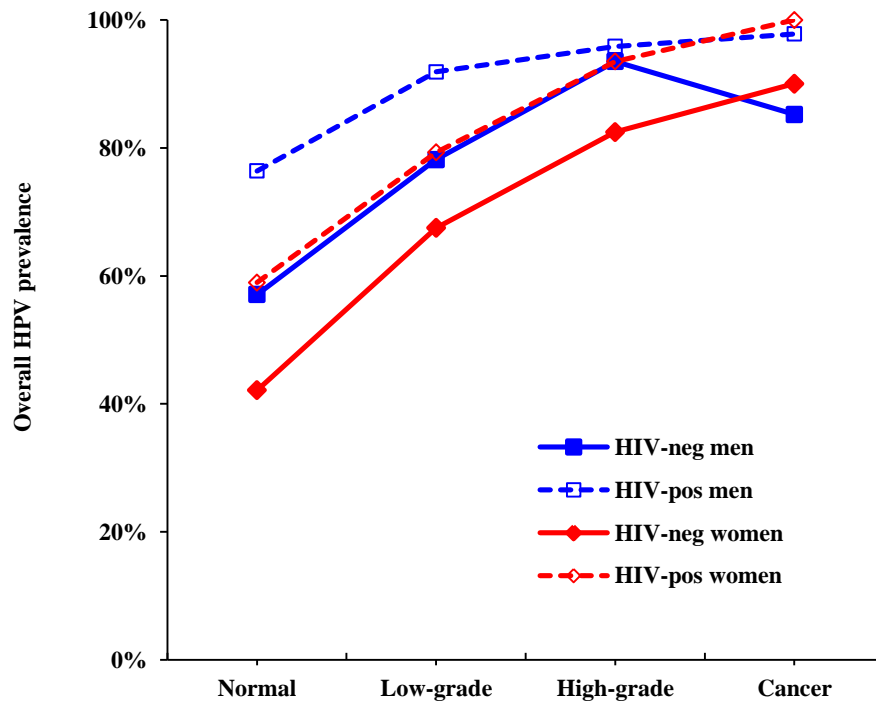

| Population    | N (%)        | N (%)        | N (%)        | N (%)       |
|---------------|--------------|--------------|--------------|-------------|
| HIV-neg men   | 1685 (57.1%) | 894 (78.2%)  | 339 (93.5%)  | 122 (85.2%) |
| HIV-pos men   | 3459 (76.4%) | 3633 (91.9%) | 1161 (95.9%) | 137 (97.8%) |
| HIV-neg women | 1764 (42.1%) | 323 (67.5%)  | 194 (82.5%)  | 201 (90.0%) |
| HIV-pos women | 1306 (59.0%) | 643 (79.3%)  | 231 (93.5%)  | 13 (100.0%) |

\*Low-grade diagnosis is defined as atypical squamous cells of undetermined significance, low-grade squamous intraepithelial lesion, or anal intraepithelial neoplasia grade 1; High-grade diagnosis is defined as high-grade squamous intraepithelial lesion, atypical squamous cells-cannot exclude high-grade squamous intraepithelial lesion, or anal intraepithelial neoplasia grade 2 or 3.



Appendix Figure 2: Prevalence of human papillomavirus 16 (HPV16), HPV18, HPV31/33/45/52/58 and prevalence ratio (PR) by anal diagnosis\* and HIV status, in HPV-positive men and women (sensitivity analysis including known HIV-negative anal cancers only)

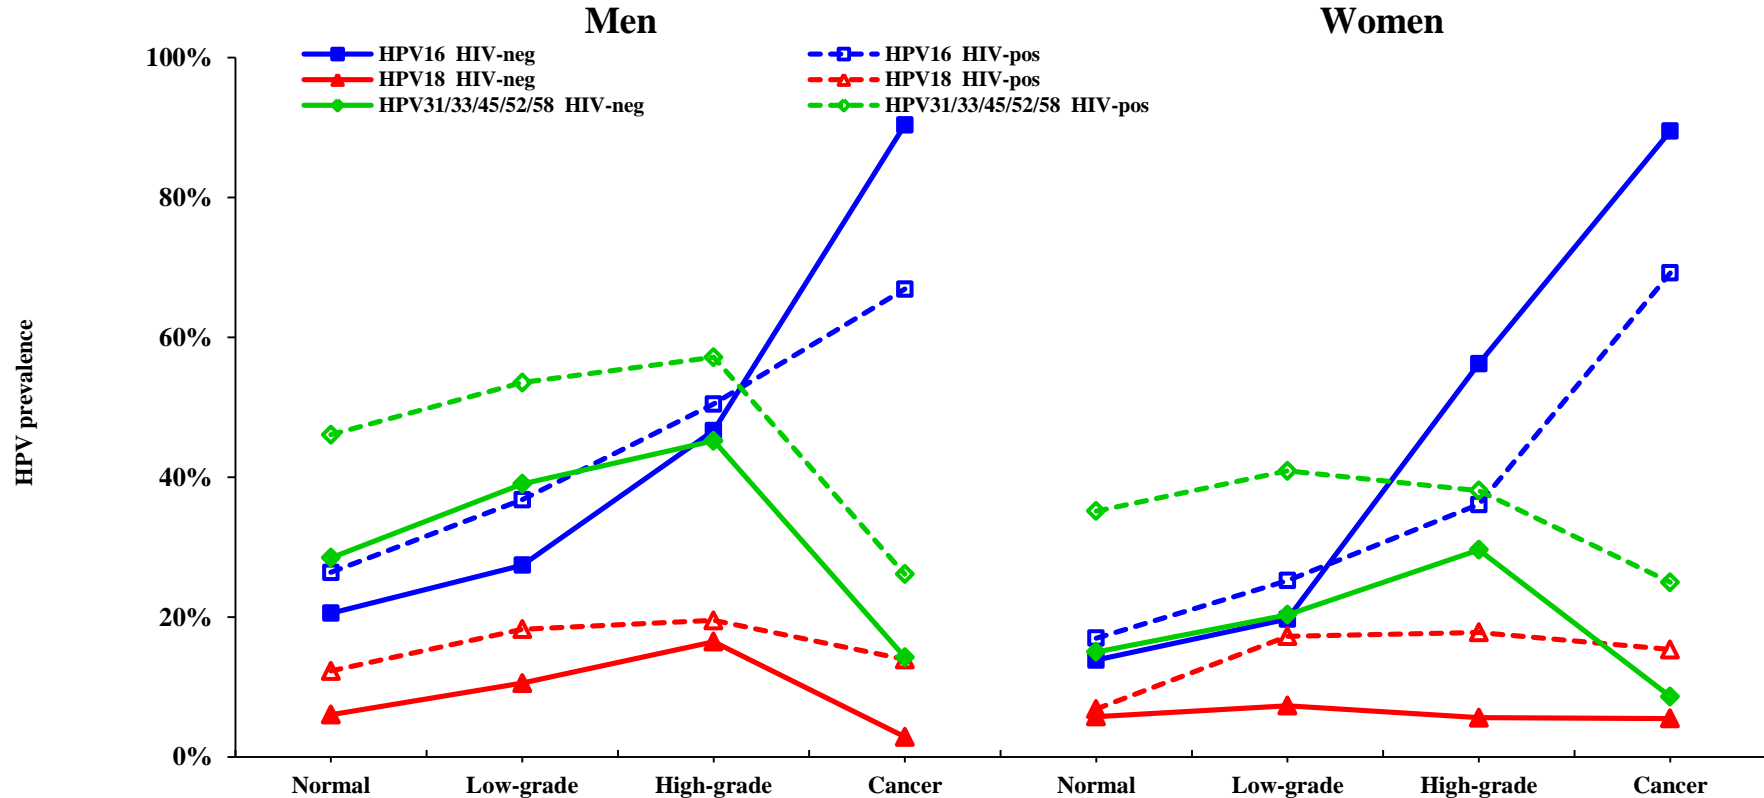

|                                       | Normal               | Low-grade            | High-grade           | Cancer                | Normal               | Low-grade            | High-grade           | Cancer                |
|---------------------------------------|----------------------|----------------------|----------------------|-----------------------|----------------------|----------------------|----------------------|-----------------------|
| Population                            | N (%)                | N (%)                | N (%)                | N (%)                 | N (%)                | N (%)                | N (%)                | N (%)                 |
| HPV16 HIV-neg                         | 972 (20.6%)          | 707 (27.4%)          | 317 (46.7%)          | 104 (90.4%)           | 743 (13.9%)          | 218 (19.7%)          | 160 (56.3%)          | 181 (89.5%)           |
| HPV16 HIV-pos                         | 2860 (26.4%)         | 3454 (36.8%)         | 1129 (50.5%)         | 136 (66.9%)           | 788 (17.0%)          | 511 (25.2%)          | 216 (36.1%)          | 13 (69.2%)            |
| <b>PR (95% CI) HIV+ vs HIV-</b>       | <b>1.3 (1.0-1.6)</b> | <b>1.3 (1.2-1.6)</b> | <b>1.1 (1.0-1.2)</b> | <b>0.7 (0.6-0.8)</b>  | <b>1.2 (0.8-1.8)</b> | <b>1.3 (1.0-1.7)</b> | <b>0.6 (0.5-0.9)</b> | <b>0.8 (0.6-1.0)</b>  |
| HPV18 HIV-neg                         | 972 (6.1%)           | 700 (10.6%)          | 303 (16.5%)          | 104 (2.9%)            | 743 (5.8%)           | 218 (7.3%)           | 160 (5.6%)           | 181 (5.5%)            |
| HPV18 HIV-pos                         | 2860 (12.3%)         | 3449 (18.3%)         | 1115 (19.6%)         | 136 (14.0%)           | 771 (6.9%)           | 463 (17.3%)          | 202 (17.8%)          | 13 (15.4%)            |
| <b>PR (95% CI) HIV+ vs HIV-</b>       | <b>2.0 (1.6-2.6)</b> | <b>1.7 (1.3-2.3)</b> | <b>1.2 (1.0-1.4)</b> | <b>4.8 (1.5-15.6)</b> | <b>1.2 (0.7-1.9)</b> | <b>2.4 (1.1-5.0)</b> | <b>3.2 (1.7-5.9)</b> | <b>2.8 (0.6-13.3)</b> |
| HPV <sub>31/33/45/52/58</sub> HIV-neg | 572 (28.5%)          | 361 (39.1%)          | 230 (45.2%)          | 56 (14.3%)            | 153 (15.0%)          | 118 (20.3%)          | 135 (29.6%)          | 104 (8.7%)            |
| HPV <sub>31/33/45/52/58</sub> HIV-pos | 1252 (46.1%)         | 1408 (53.6%)         | 474 (57.2%)          | 107 (26.2%)           | 91 (35.2%)           | 88 (40.9%)           | 63 (38.1%)           | 12 (25.0%)            |
| <b>PR (95% CI) HIV+ vs HIV-</b>       | <b>1.6 (1.5-1.8)</b> | <b>1.4 (1.1-1.7)</b> | <b>1.3 (1.1-1.5)</b> | <b>1.8 (1.1-2.9)</b>  | <b>2.3 (1.8-3.1)</b> | <b>2.0 (1.1-3.5)</b> | <b>1.3 (0.7-2.4)</b> | <b>2.9 (0.9-9.6)</b>  |

\* Low-grade diagnosis is defined as atypical squamous cells of undetermined significance, low-grade squamous intraepithelial lesion, or anal intraepithelial neoplasia grade 1; High-grade diagnosis is defined as high-grade squamous intraepithelial lesion, atypical squamous cells-cannot exclude high-grade squamous intraepithelial lesion, or anal intraepithelial neoplasia grade 2 or 3.

**Appendix Figure 3: Cancer:normal prevalence ratio (PR) in human papillomavirus (HPV)-positive samples of HPV types by HIV status (sensitivity analysis including known HIV-negative anal cancers only)**

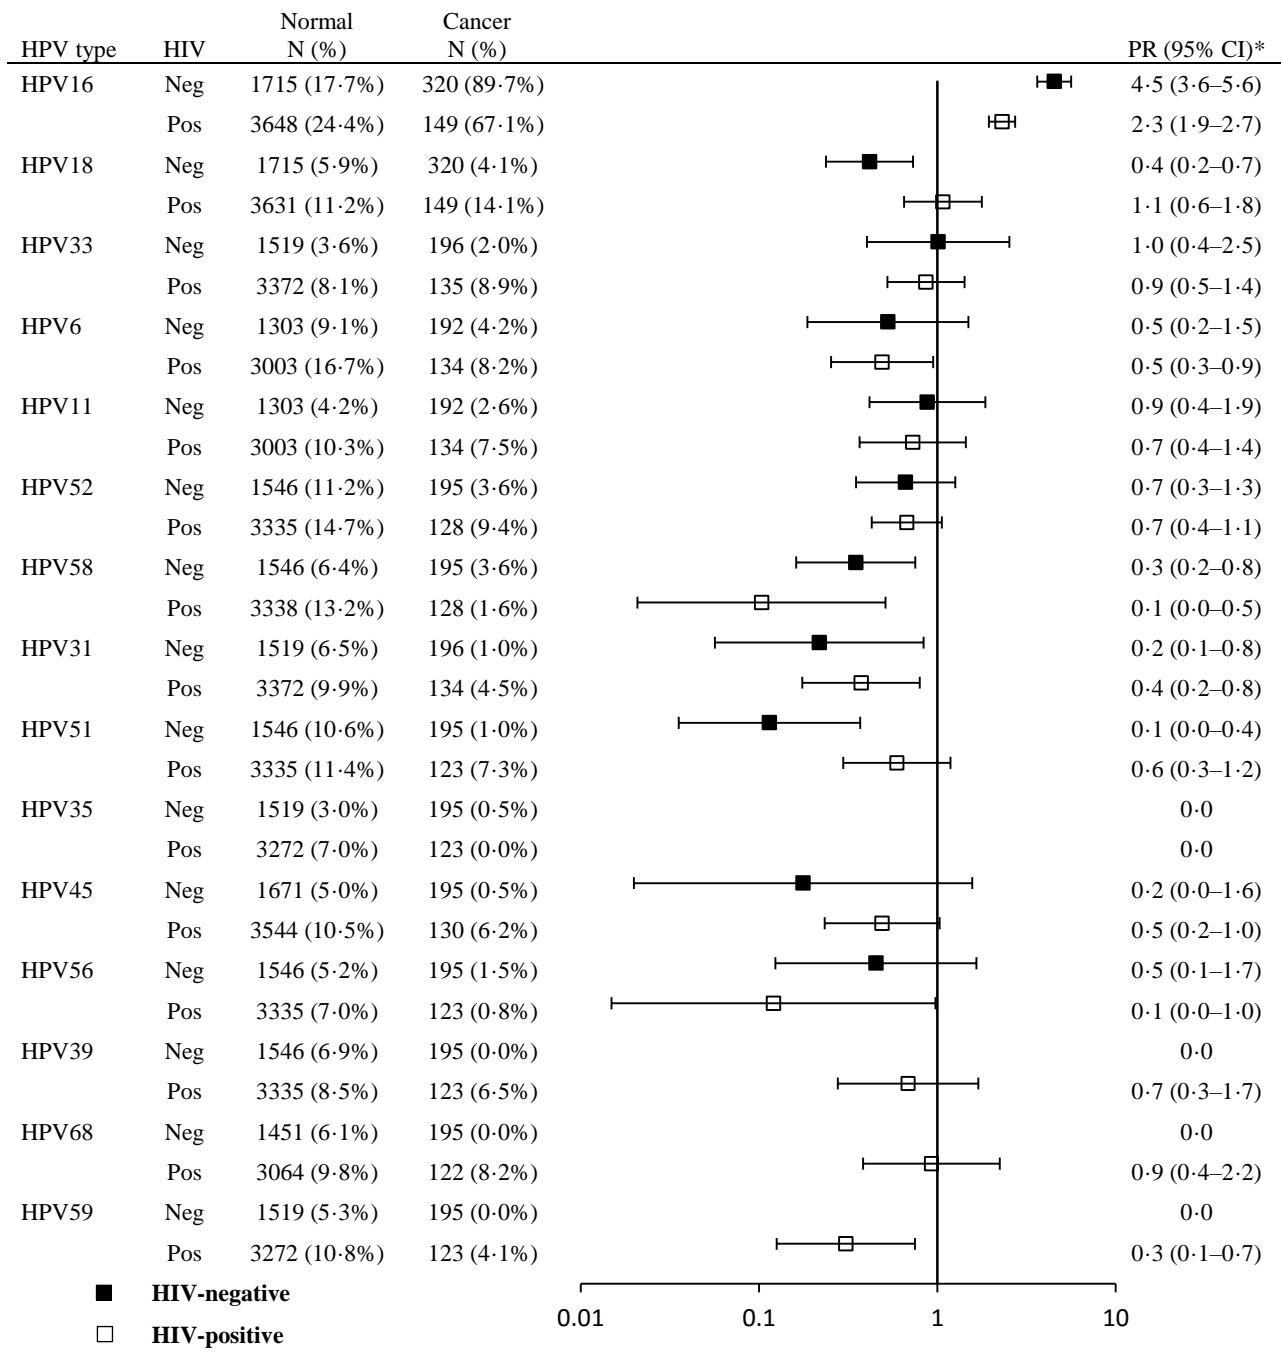

\*Adjusted by gender and region.

**Appendix Figure 4: Prevalence of human papillomavirus 16 (HPV16), HPV18, HPV31/33/45/52/58 and prevalence ratio (PR) in HPV-positive men by anal diagnosis\* and HIV status: in North America only**

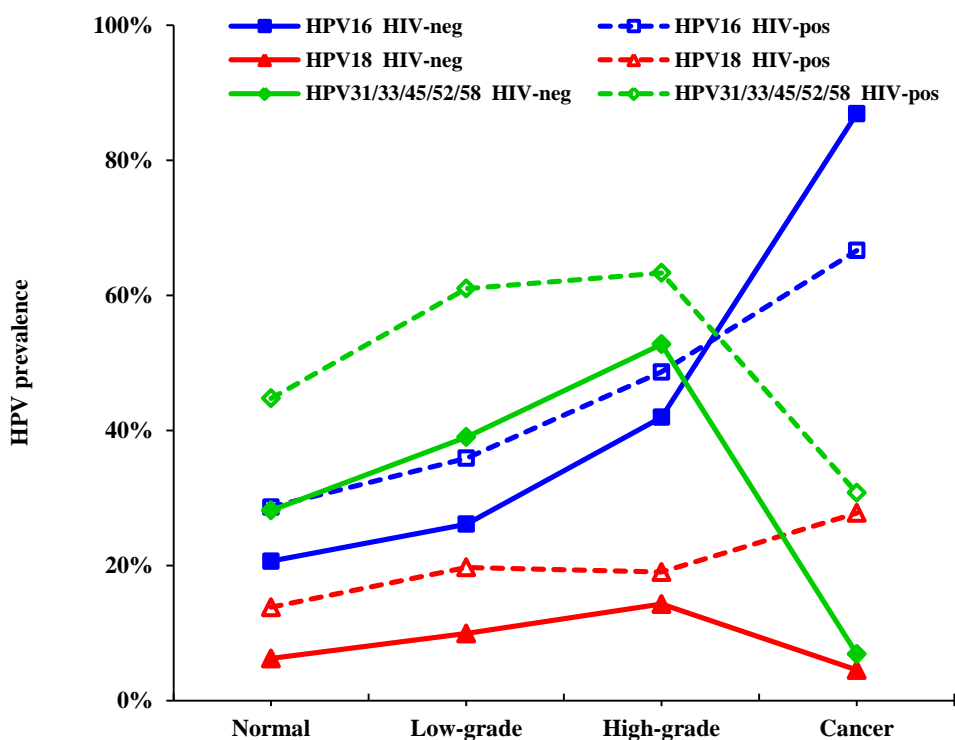

| Population                      | N (%)                | N (%)                | N (%)                | N (%)                 |
|---------------------------------|----------------------|----------------------|----------------------|-----------------------|
| HPV16 HIV-neg                   | 625 (20.6%)          | 440 (26.1%)          | 112 (42.0%)          | 199 (86.9%)†          |
| HPV16 HIV-pos                   | 890 (28.7%)          | 1318 (35.9%)         | 450 (48.7%)          | 18 (66.7%)            |
| <b>PR (95% CI) HIV+ vs HIV-</b> | <b>1.4 (1.0–1.9)</b> | <b>1.4 (1.1–1.8)</b> | <b>1.2 (0.9–1.5)</b> | <b>0.8 (0.6–0.9)</b>  |
| HPV18 HIV-neg                   | 625 (6.2%)           | 433 (9.9%)           | 98 (14.3%)           | 199 (4.5%)†           |
| HPV18 HIV-pos                   | 890 (13.8%)          | 1313 (19.7%)         | 436 (19.0%)          | 18 (27.8%)            |
| <b>PR (95% CI) HIV+ vs HIV-</b> | <b>2.2 (1.7–3.0)</b> | <b>2.0 (1.3–3.1)</b> | <b>1.3 (1.0–1.8)</b> | <b>6.1 (2.6–14.3)</b> |
| HPV31/33/45/52/58 HIV-neg       | 426 (28.2%)          | 205 (39.0%)          | 36 (52.8%)           | 116 (6.9%)†           |
| HPV31/33/45/52/58 HIV-pos       | 438 (44.7%)          | 372 (61.0%)          | 60 (63.3%)           | 13 (30.8%)            |
| <b>PR (95% CI) HIV+ vs HIV-</b> | <b>1.6 (1.5–1.7)</b> | <b>1.6 (1.2–2.0)</b> | <b>1.2 (1.0–1.4)</b> | <b>4.5 (1.9–10.7)</b> |

\*Low-grade diagnosis is defined as atypical squamous cells of undetermined significance, low-grade squamous intraepithelial lesion, or anal intraepithelial neoplasia grade 1; High-grade diagnosis is defined as high-grade squamous intraepithelial lesion, atypical squamous cells-cannot exclude high-grade squamous intraepithelial lesion, or anal intraepithelial neoplasia grade 2 or 3.

†Anal cancers of unknown HIV status are assumed to be HIV-negative.

**Appendix Figure 5: Prevalence of human papillomavirus 16 (HPV16), HPV18, HPV31/33/45/52/58 and prevalence ratio (PR) in HPV-positive men by anal diagnosis\* and HIV status: in Europe only**

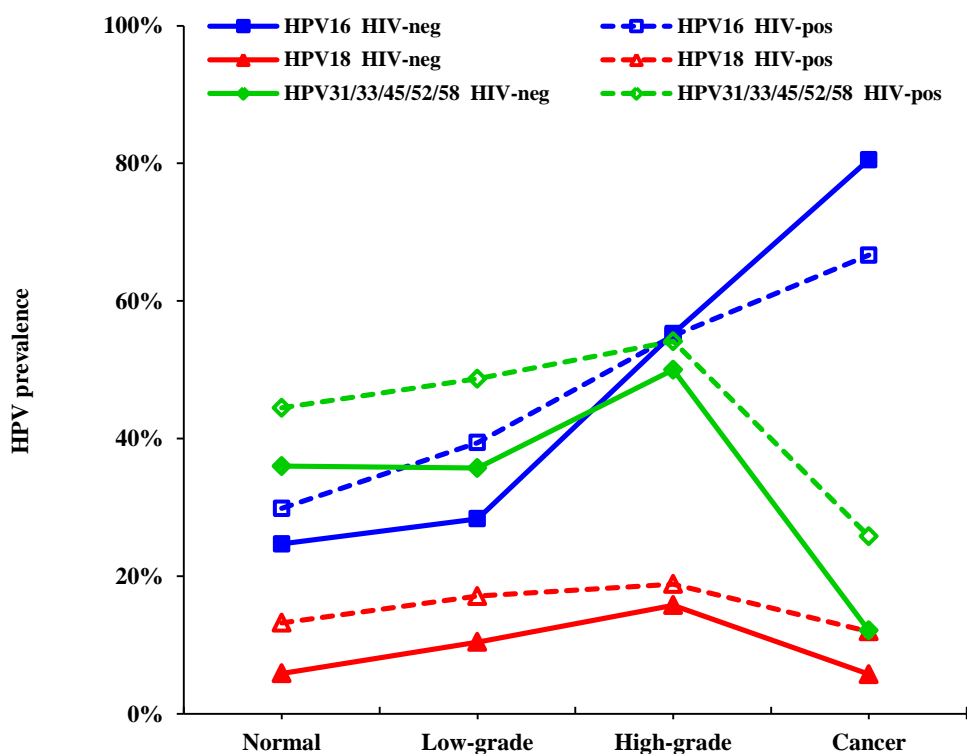

| Population                      | N (%)                | N (%)                | N (%)                | N (%)                |
|---------------------------------|----------------------|----------------------|----------------------|----------------------|
| HPV16 HIV-neg                   | 170 (24.7%)          | 134 (28.4%)          | 38 (55.3%)           | 505 (80.2%)†         |
| HPV16 HIV-pos                   | 1241 (30.1%)         | 1553 (39.5%)         | 428 (55.1%)          | 117 (66.7%)          |
| <b>PR (95% CI) HIV+ vs HIV-</b> | <b>1.2 (1.0–1.5)</b> | <b>1.4 (1.2–1.7)</b> | <b>1.0 (0.8–1.2)</b> | <b>0.8 (0.7–0.9)</b> |
| HPV18 HIV-neg                   | 170 (5.9%)           | 134 (10.4%)          | 38 (15.8%)           | 505 (5.7%)†          |
| HPV18 HIV-pos                   | 1241 (13.1%)         | 1553 (17.3%)         | 428 (18.9%)          | 117 (12.0%)          |
| <b>PR (95% CI) HIV+ vs HIV-</b> | <b>2.2 (1.5–3.4)</b> | <b>1.7 (0.8–3.6)</b> | <b>1.2 (0.6–2.5)</b> | <b>2.1 (1.4–3.1)</b> |
| HPV31/33/45/52/58 HIV-neg       | 25 (36.0%)           | 42 (35.7%)           | 36 (50.0%)           | 165 (12.1%)†         |
| HPV31/33/45/52/58 HIV-pos       | 416 (44.5%)          | 735 (48.7%)          | 277 (54.2%)          | 93 (25.8%)           |
| <b>PR (95% CI) HIV+ vs HIV-</b> | <b>1.2 (0.6–2.4)</b> | <b>1.4 (1.1–1.8)</b> | <b>1.1 (0.9–1.3)</b> | <b>2.1 (1.0–4.7)</b> |

\*Low-grade diagnosis is defined as atypical squamous cells of undetermined significance, low-grade squamous intraepithelial lesion, or anal intraepithelial neoplasia grade 1; High-grade diagnosis is defined as high-grade squamous intraepithelial lesion, atypical squamous cells-cannot exclude high-grade squamous intraepithelial lesion, or anal intraepithelial neoplasia grade 2 or 3.

†Anal cancers of unknown HIV status are assumed to be HIV-negative.

Appendix Figure 6: Prevalence of human papillomavirus 16 (HPV16), HPV18, HPV31/33/45/52/58 and prevalence ratio (PR) in HPV-positive men by nine grades of cytological and histological anal diagnosis and HIV status

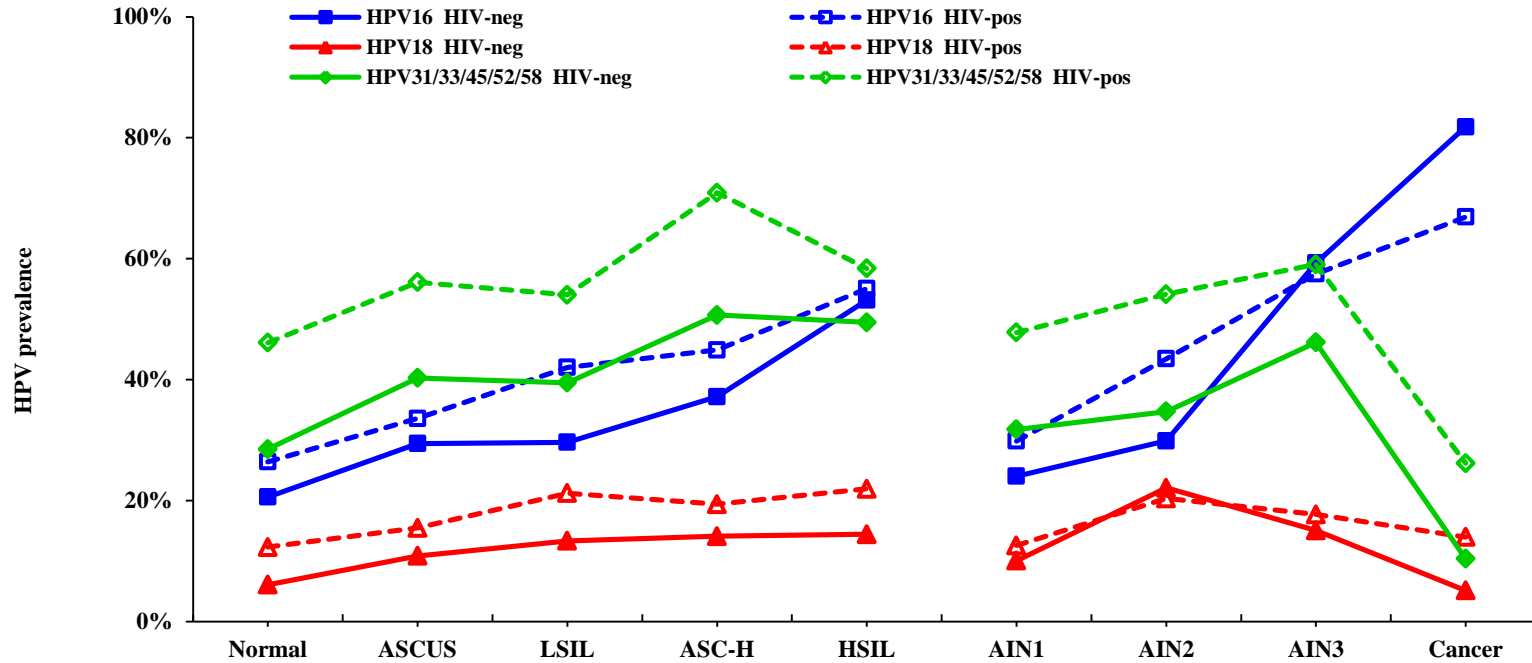

| Population                            | N (%)                |
|---------------------------------------|----------------------|----------------------|----------------------|----------------------|----------------------|----------------------|----------------------|----------------------|----------------------|
| HPV16 HIV-neg                         | 972 (20.6%)          | 452 (29.4%)          | 270 (29.6%)          | 78 (37.2%)           | 111 (53.2%)          | 179 (24.0%)          | 77 (29.9%)           | 113 (59.3%)          | 778 (82.0%)*         |
| HPV16 HIV-pos                         | 2860 (26.4%)         | 1254 (33.6%)         | 2032 (42.0%)         | 98 (44.9%)           | 447 (55.0%)          | 764 (29.8%)          | 290 (43.4%)          | 294 (57.5%)          | 136 (66.9%)          |
| <b>PR (95% CI) HIV+ vs HIV-</b>       | <b>1.3 (1.0-1.6)</b> | <b>1.1 (1.0-1.4)</b> | <b>1.4 (1.2-1.7)</b> | <b>1.2 (0.9-1.6)</b> | <b>1.0 (0.8-1.3)</b> | <b>1.2 (1.0-1.6)</b> | <b>1.5 (1.1-1.9)</b> | <b>1.0 (0.8-1.1)</b> | <b>0.8 (0.7-0.9)</b> |
| HPV18 HIV-neg                         | 972 (6.1%)           | 452 (10.8%)          | 270 (13.3%)          | 78 (14.1%)           | 111 (14.4%)          | 179 (10.1%)          | 77 (22.1%)           | 113 (15.0%)          | 778 (5.1%)*          |
| HPV18 HIV-pos                         | 2860 (12.3%)         | 1254 (15.5%)         | 2032 (21.2%)         | 98 (19.4%)           | 447 (21.9%)          | 764 (12.6%)          | 290 (20.3%)          | 294 (17.7%)          | 136 (14.0%)          |
| <b>PR (95% CI) HIV+ vs HIV-</b>       | <b>2.0 (1.6-2.6)</b> | <b>1.4 (1.0-2.1)</b> | <b>1.6 (1.2-2.2)</b> | <b>1.4 (1.0-1.8)</b> | <b>1.5 (1.1-2.1)</b> | <b>1.2 (0.9-1.8)</b> | <b>0.9 (0.5-1.7)</b> | <b>1.2 (0.8-1.6)</b> | <b>2.7 (1.7-4.3)</b> |
| HPV <sub>31/33/45/52/58</sub> HIV-neg | 572 (28.5%)          | 226 (40.3%)          | 114 (39.5%)          | 73 (50.7%)           | 93 (49.5%)           | 148 (31.8%)          | 72 (34.7%)           | 104 (46.2%)          | 338 (10.4%)*         |
| HPV <sub>31/33/45/52/58</sub> HIV-pos | 1252 (46.1%)         | 599 (56.1%)          | 783 (54.0%)          | 55 (70.9%)           | 221 (58.4%)          | 341 (47.8%)          | 170 (54.1%)          | 188 (59.0%)          | 107 (26.2%)          |
| <b>PR (95% CI) HIV+ vs HIV-</b>       | <b>1.6 (1.5-1.8)</b> | <b>1.4 (1.2-1.7)</b> | <b>1.4 (1.0-1.9)</b> | <b>1.4 (1.2-1.6)</b> | <b>1.2 (1.0-1.5)</b> | <b>1.5 (1.1-2.1)</b> | <b>1.6 (1.1-2.1)</b> | <b>1.3 (1.1-1.5)</b> | <b>2.5 (1.5-4.3)</b> |

ASCUS=atypical squamous cells of undetermined significance. LSIL=low-grade squamous intraepithelial lesion. ASC-H=atypical squamous cells-cannot exclude HSIL.

HSIL= high-grade squamous intraepithelial lesion. AIN=anal intraepithelial neoplasia.

\*Anal cancers of unknown HIV status are assumed to be HIV-negative.

Appendix Figure 7: Prevalence of human papillomavirus 16 (HPV16), HPV18, HPV31/33/45/52/58 and prevalence ratio (PR) in HPV-positive women by nine grades of cytological and histological anal diagnosis and HIV status

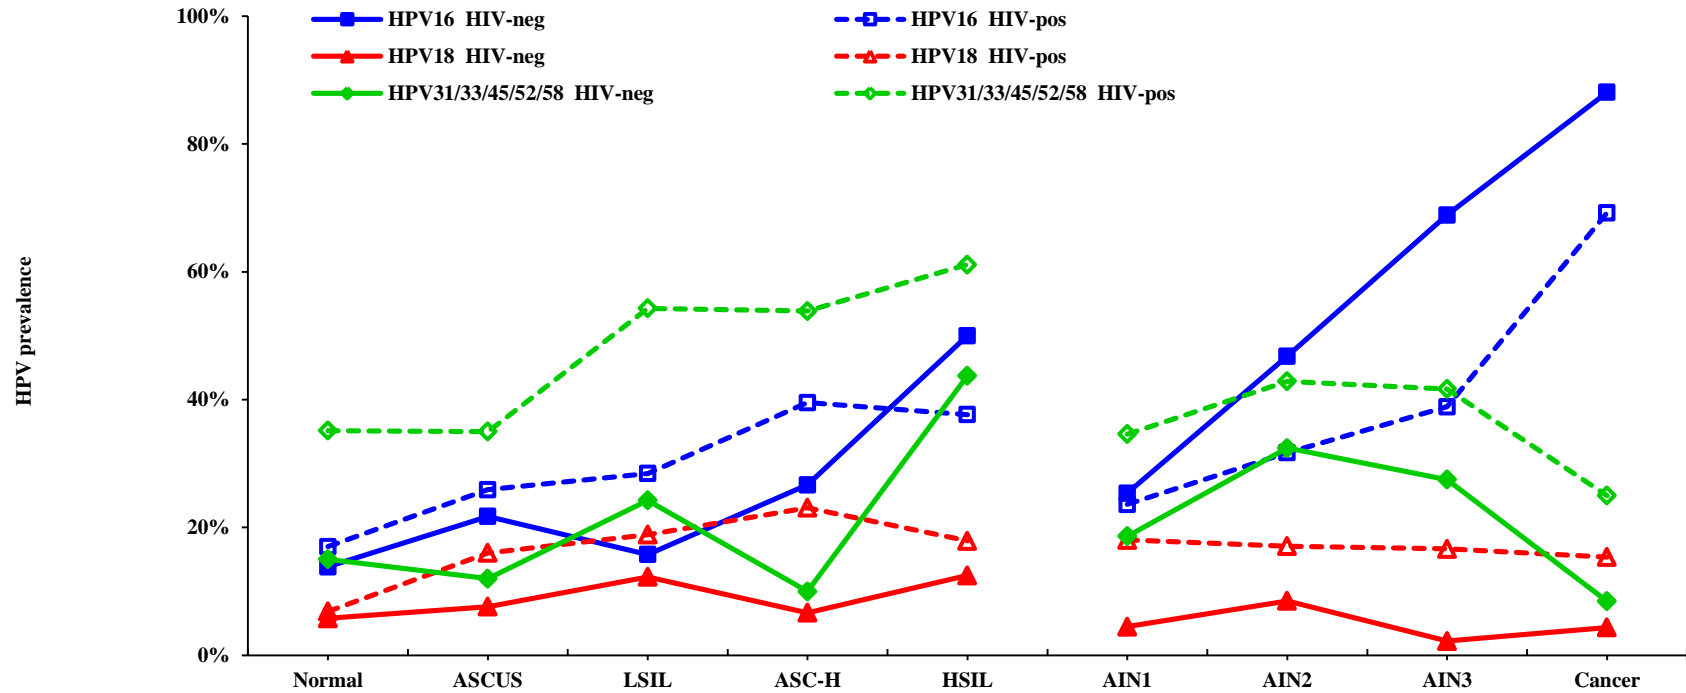

| Population                      | N (%)                | N (%)                 | N (%)                 |
|---------------------------------|----------------------|-----------------------|----------------------|-----------------------|----------------------|-----------------------|----------------------|-----------------------|-----------------------|
| HPV16 HIV-neg                   | 743 (13.9%)          | 92 (21.7%)            | 57 (15.8%)           | 15 (26.7%)            | 24 (50.0%)           | 67 (25.4%)            | 47 (46.8%)           | 45 (68.9%)            | 1149 (88.1%)*         |
| HPV16 HIV-pos                   | 788 (17.0%)          | 216 (25.9%)           | 218 (28.4%)          | 43 (39.5%)            | 77 (37.7%)           | 72 (23.6%)            | 41 (31.7%)           | 54 (38.9%)            | 13 (69.2%)            |
| <b>PR (95% CI) HIV+ vs HIV-</b> | <b>1.2 (0.8-1.8)</b> | <b>1.2 (0.8-1.7)</b>  | <b>1.8 (1.1-3.0)</b> | <b>1.5 (0.6-3.7)</b>  | <b>0.8 (0.4-1.4)</b> | <b>0.9 (0.6-1.4)</b>  | <b>0.7 (0.3-1.5)</b> | <b>0.6 (0.3-0.9)</b>  | <b>0.8 (0.6-1.0)</b>  |
| HPV18 HIV-neg                   | 743 (5.8%)           | 92 (7.6%)             | 57 (12.3%)           | 15 (6.7%)             | 24 (12.5%)           | 67 (4.5%)             | 47 (8.5%)            | 45 (2.2%)             | 1149 (4.4%)*          |
| HPV18 HIV-pos                   | 771 (6.9%)           | 206 (16.0%)           | 180 (18.9%)          | 39 (23.1%)            | 67 (17.9%)           | 72 (18.1%)            | 41 (17.1%)           | 54 (16.7%)            | 13 (15.4%)            |
| <b>PR (95% CI) HIV+ vs HIV-</b> | <b>1.2 (0.7-1.9)</b> | <b>2.1 (0.8-5.4)</b>  | <b>1.5 (0.6-3.8)</b> | <b>3.5 (0.4-31.6)</b> | <b>1.4 (0.5-4.5)</b> | <b>4.0 (1.3-12.7)</b> | <b>2.0 (0.8-5.0)</b> | <b>7.5 (1.7-32.4)</b> | <b>3.5 (0.9-14.0)</b> |
| HPV31/33/45/52/58 HIV-neg       | 153 (15.0%)          | 25 (12.0%)            | 33 (24.2%)           | 10 (10.0%)            | 16 (43.8%)           | 59 (18.6%)            | 37 (32.4%)           | 40 (27.5%)            | 745 (8.5%)*           |
| HPV31/33/45/52/58 HIV-pos       | 91 (35.2%)           | 40 (35.0%)            | 35 (54.3%)           | 13 (53.8%)            | 18 (61.1%)           | 26 (34.6%)            | 7 (42.9%)            | 12 (41.7%)            | 12 (25.0%)            |
| <b>PR (95% CI) HIV+ vs HIV-</b> | <b>2.3 (1.8-3.1)</b> | <b>2.9 (0.8-10.2)</b> | <b>2.2 (0.9-5.6)</b> | <b>5.4 (2.5-11.5)</b> | <b>1.4 (1.1-1.8)</b> | <b>1.9 (1.0-3.5)</b>  | <b>1.3 (0.8-2.1)</b> | <b>1.5 (1.0-2.4)</b>  | <b>3.0 (1.6-5.6)</b>  |

ASCUS=atypical squamous cells of undetermined significance. LSIL=low-grade squamous intraepithelial lesion. ASC-H=atypical squamous cells-cannot exclude HSIL.

HSIL=high-grade squamous intraepithelial lesion. AIN=anal intraepithelial neoplasia.

\*Anal cancers of unknown HIV status are assumed to be HIV-negative.

**Appendix Figure 8: Funnel plots of human papillomavirus 16 (HPV16) prevalence in HPV-positive men by anal diagnosis\* and HIV status**

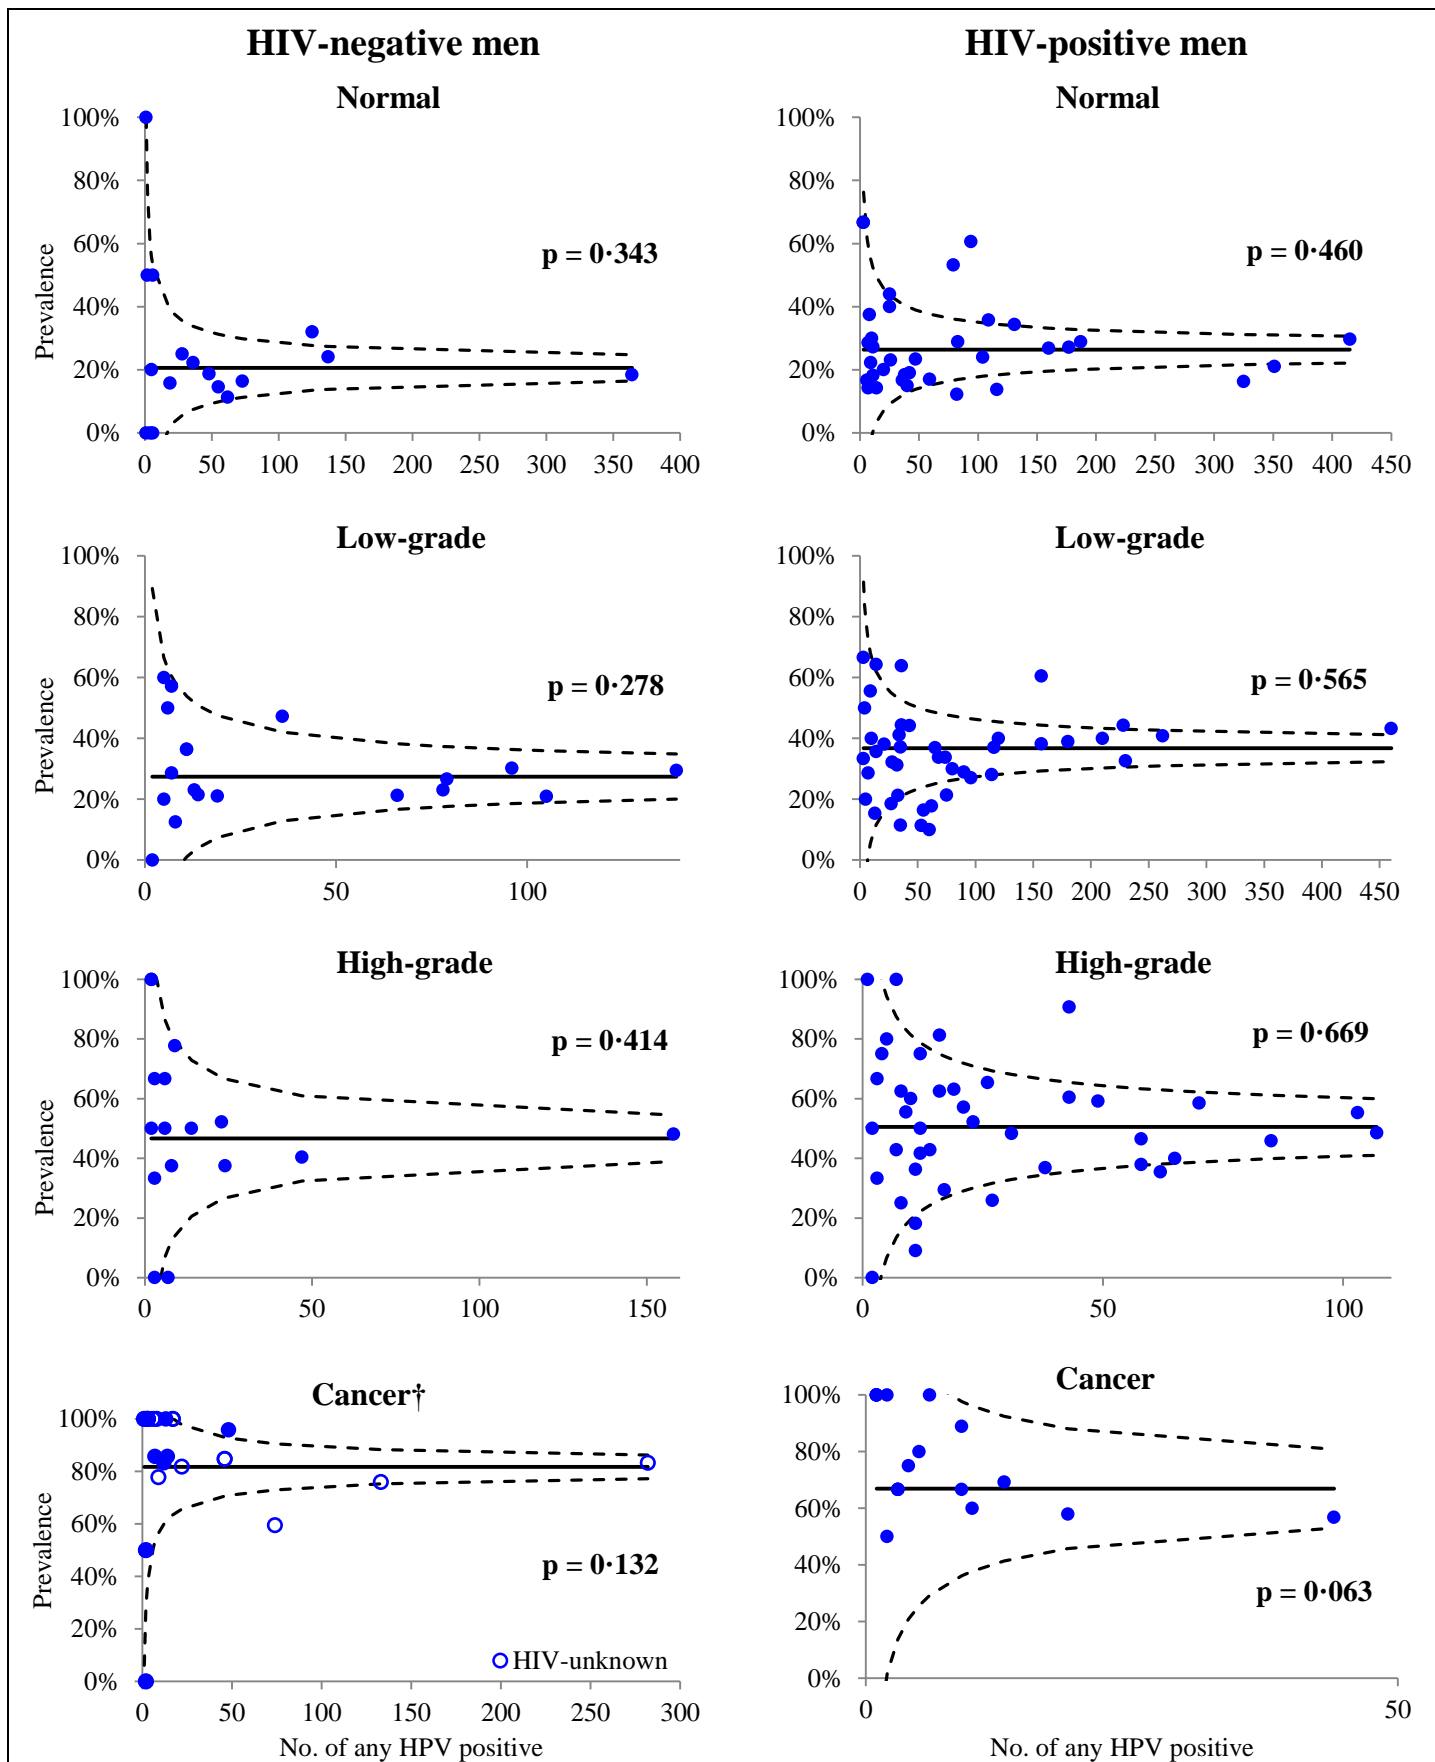

\*Low-grade diagnosis is defined as atypical squamous cells of undetermined significance, low-grade squamous intraepithelial lesion, or anal intraepithelial neoplasia grade 1; High-grade diagnosis is defined as high-grade squamous intraepithelial lesion, atypical squamous cells-cannot exclude high-grade squamous intraepithelial lesion, or anal intraepithelial neoplasia grade 2 or 3.

†Anal cancers of unknown HIV status are assumed to be HIV-negative.

**Appendix Figure 9: Funnel plots of human papillomavirus 16 (HPV16) prevalence in HPV-positive women by anal diagnosis\* and HIV status**

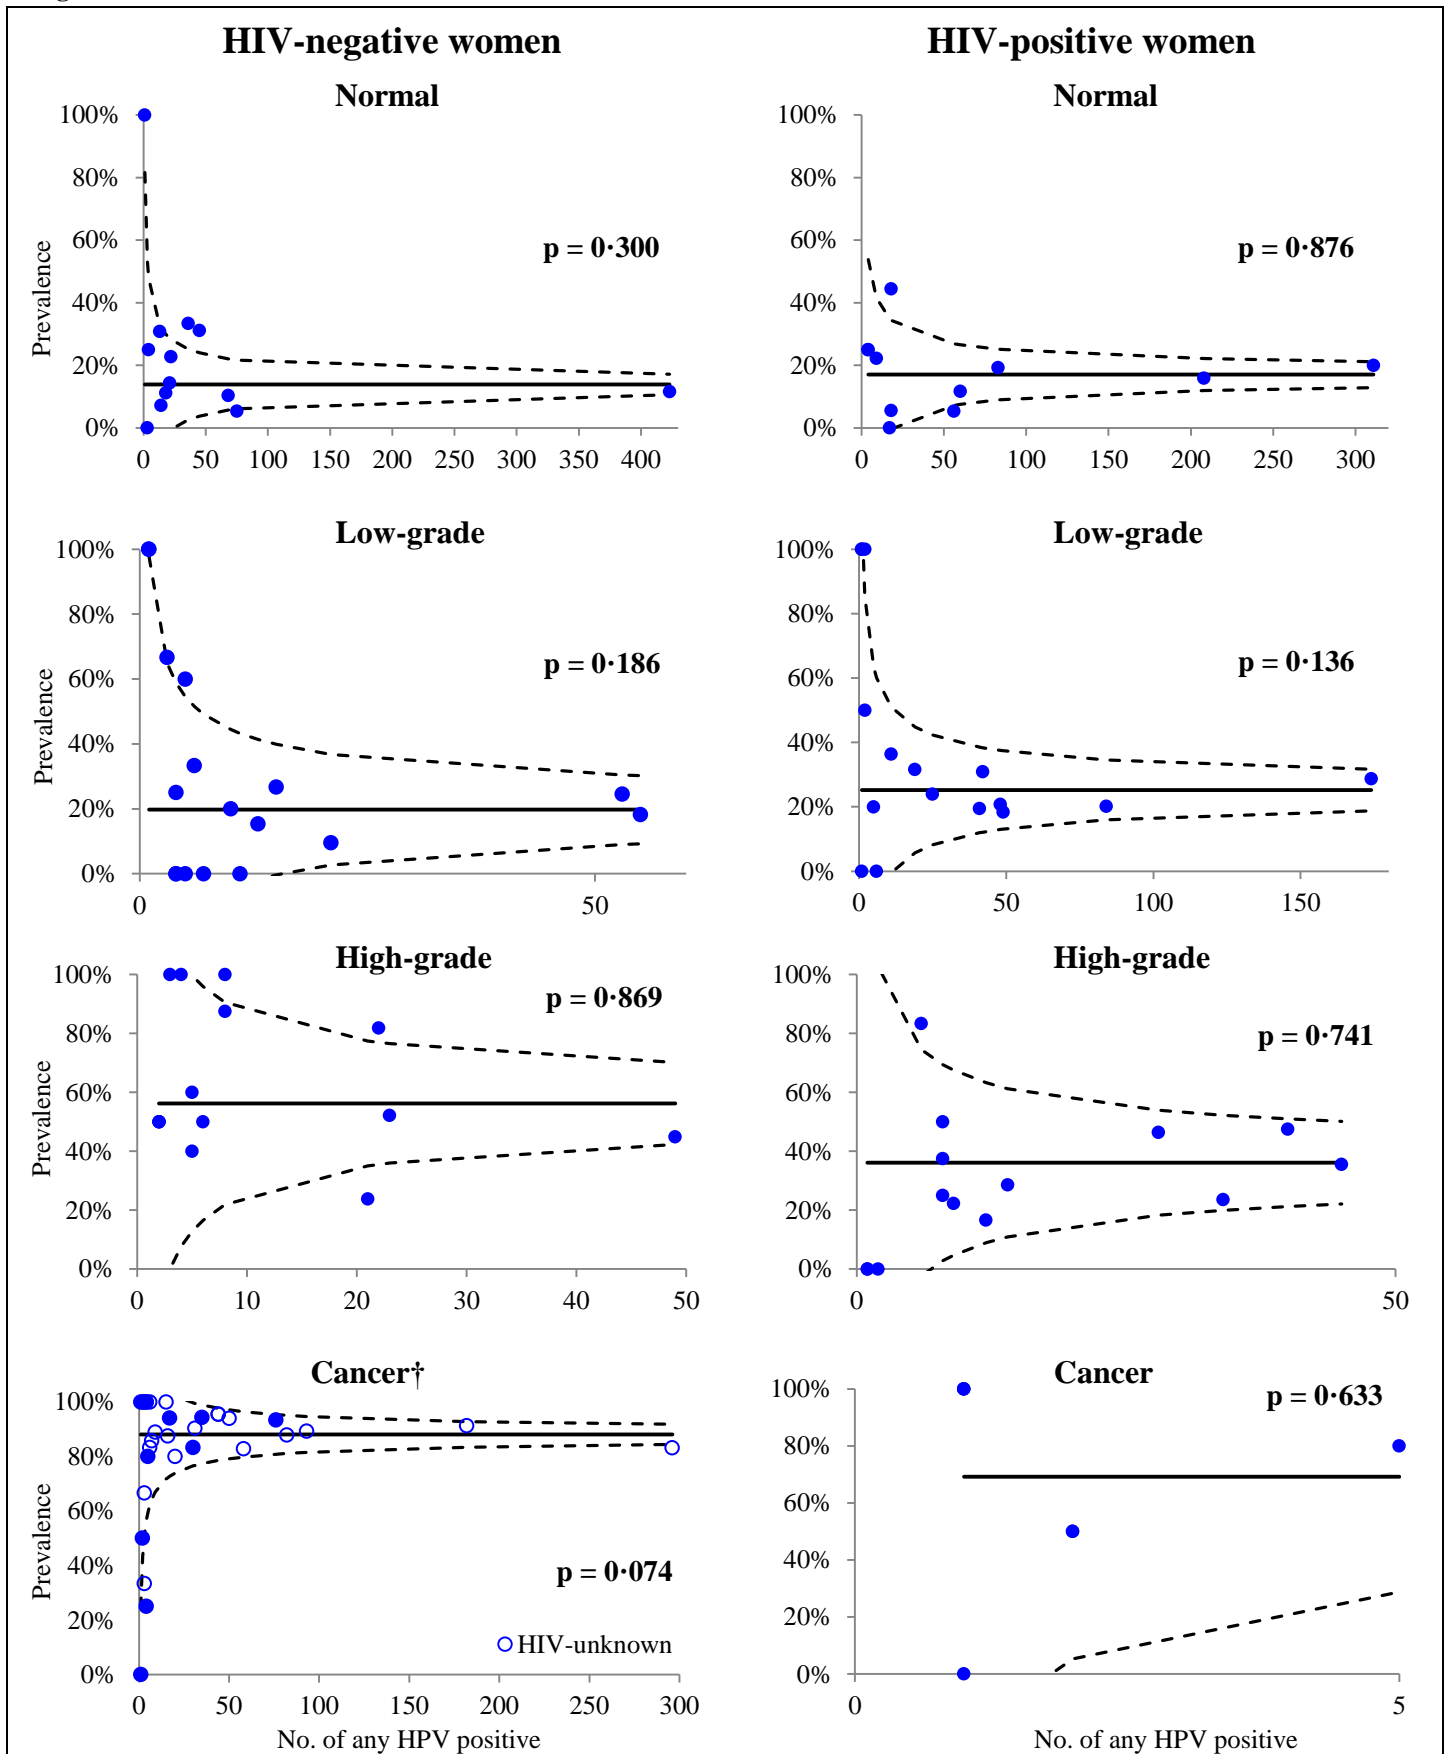

\*Low-grade diagnosis is defined as atypical squamous cells of undetermined significance, low-grade squamous intraepithelial lesion, or anal intraepithelial neoplasia grade 1; High-grade diagnosis is defined as high-grade squamous intraepithelial lesion, atypical squamous cells-cannot exclude high-grade squamous intraepithelial lesion, or anal intraepithelial neoplasia grade 2 or 3.

†Anal cancers of unknown HIV status are assumed to be HIV-negative.
